# Supplementary material
Source: PubMed Central journal article supplement (PMC4528678)

**Supplementary Data**

**Total synthesis of dihydrolysergic acid and dihydrolysergol: development of a divergent synthetic strategy applicable to rapid assembly of D-ring analogs**

Kiyoun Lee, Yam B. Poudel, Christopher M. Glinkerman, and Dale L. Boger\*

*Department of Chemistry and the Skaggs Institute for Chemical Biology, The Scripps Research Institute,  
10550 North Torrey Pines Road, La Jolla, California 92037, United States*

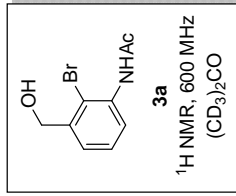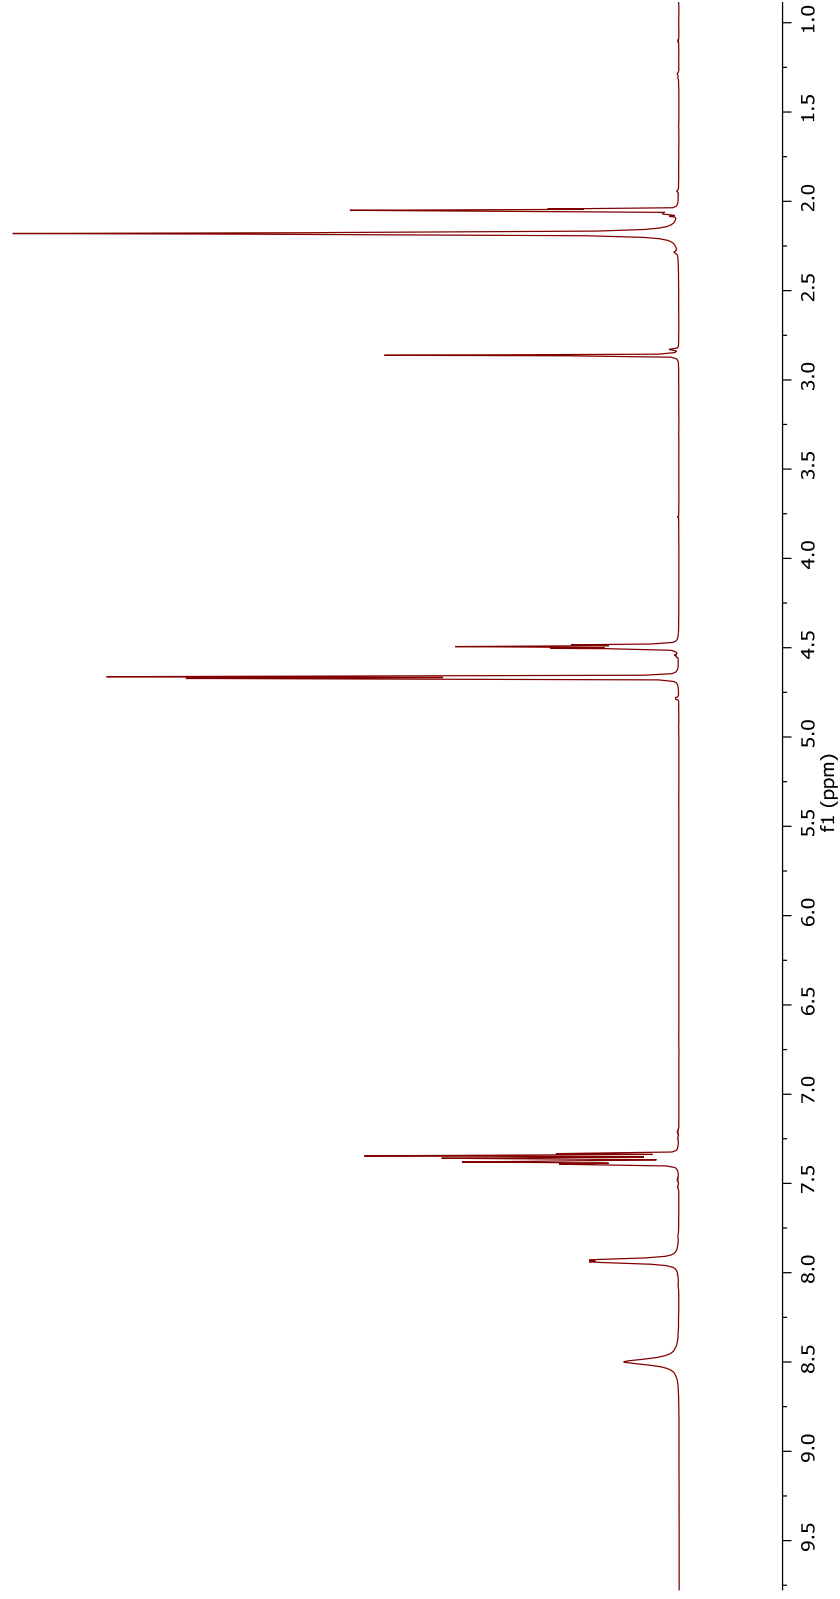

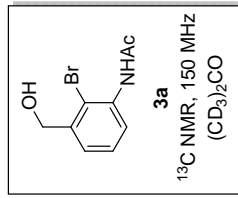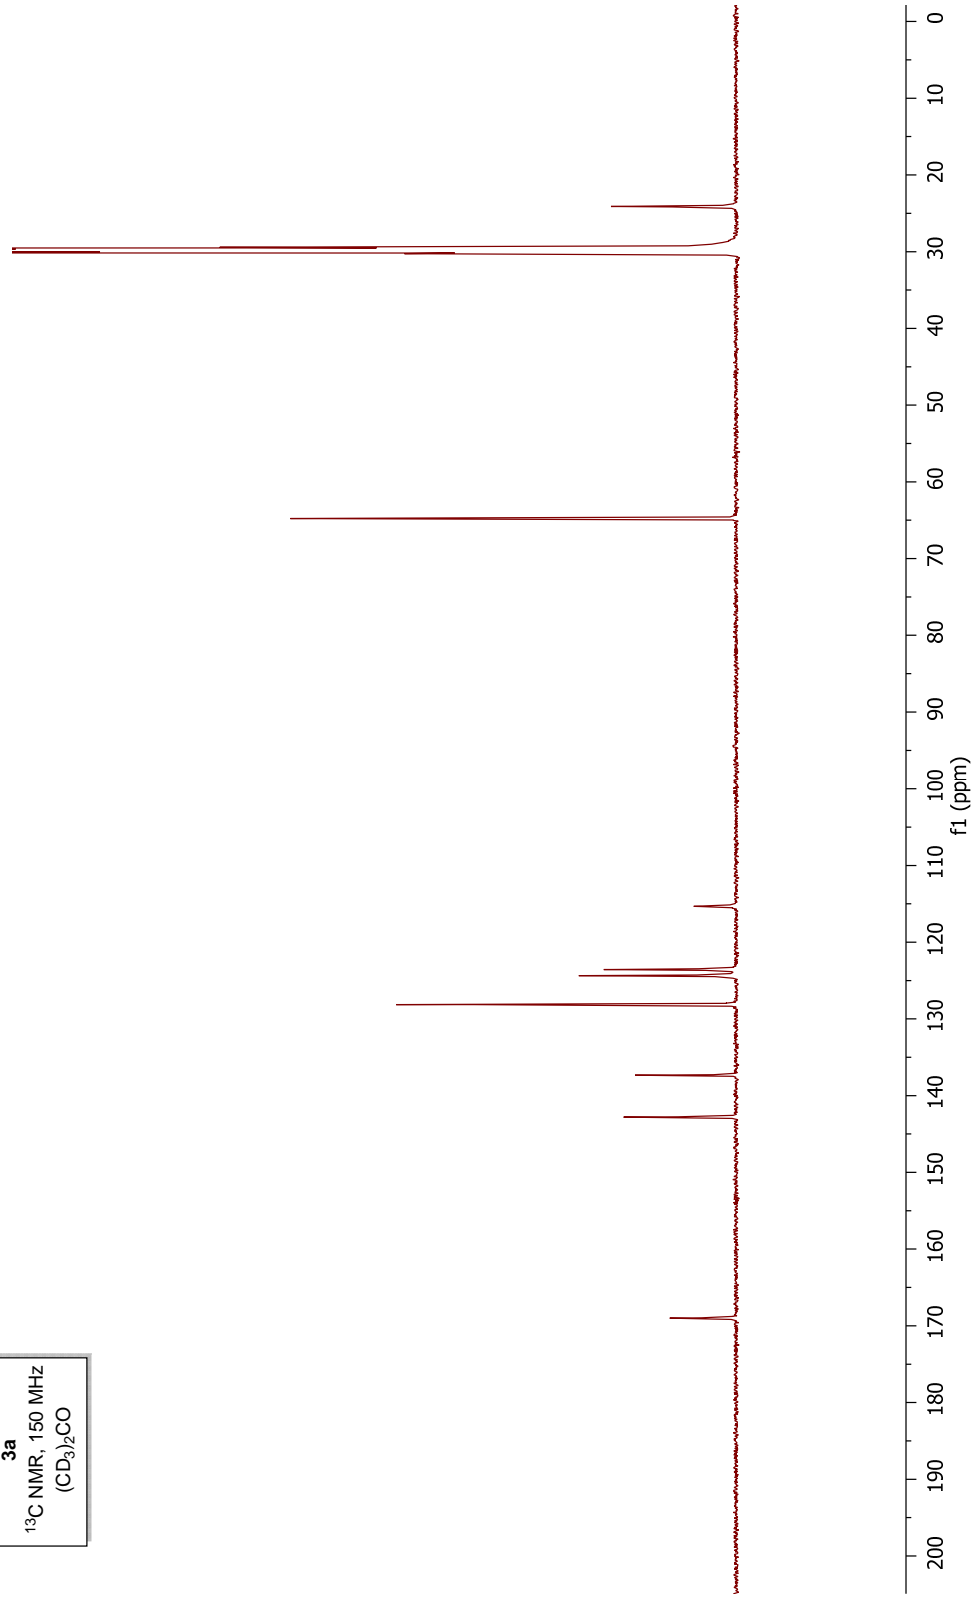

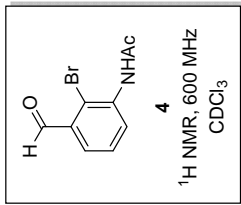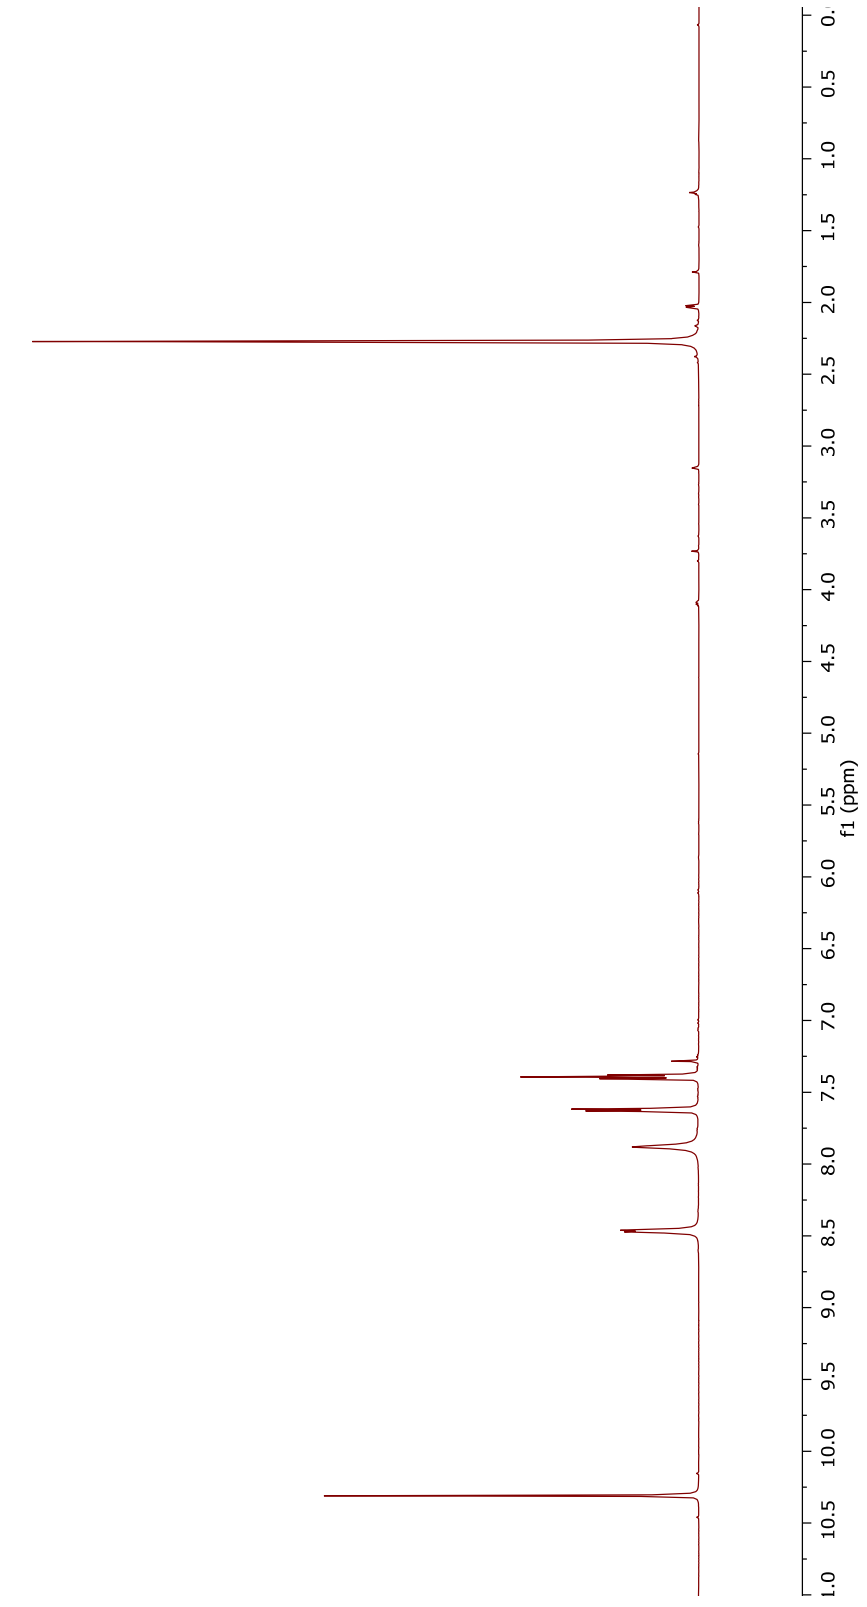

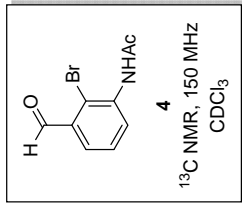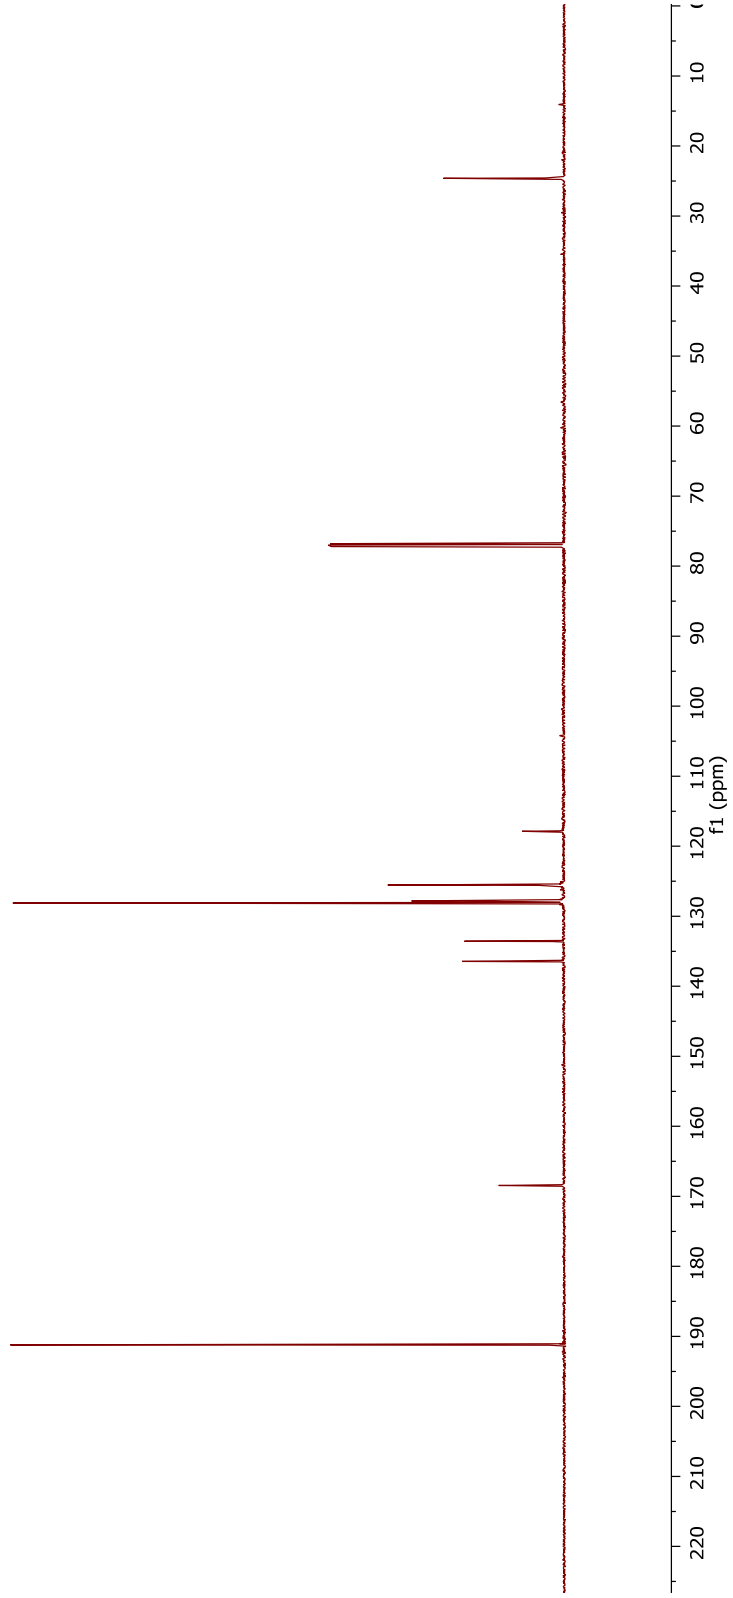

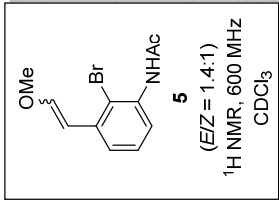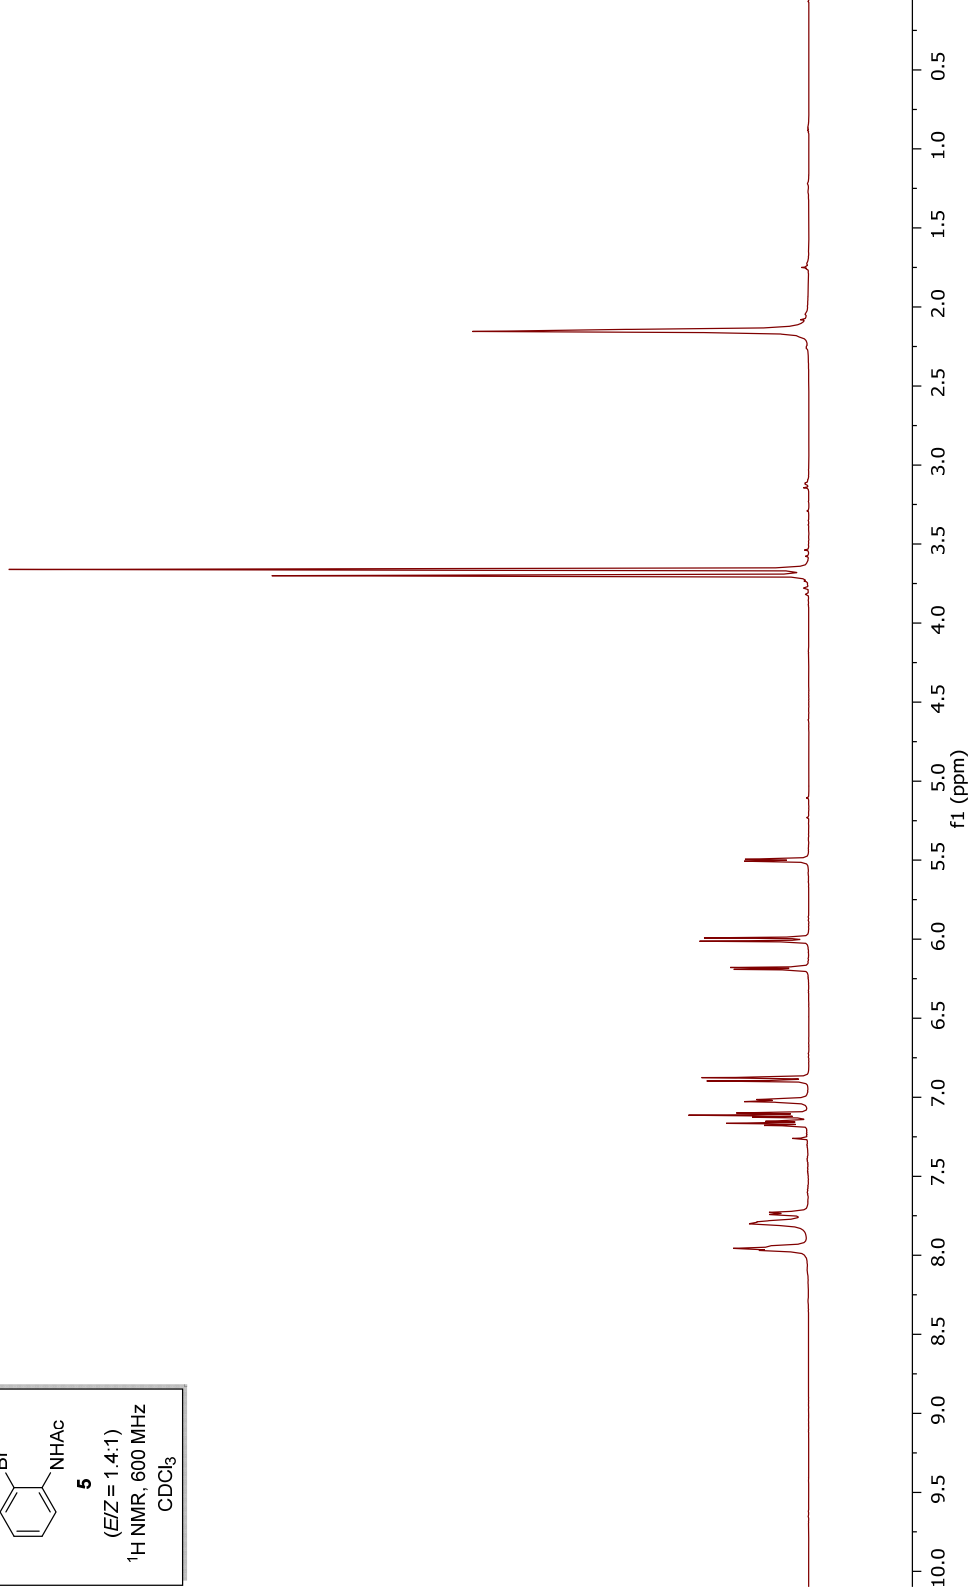

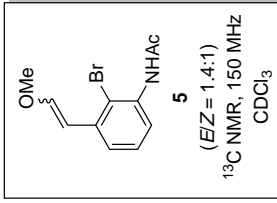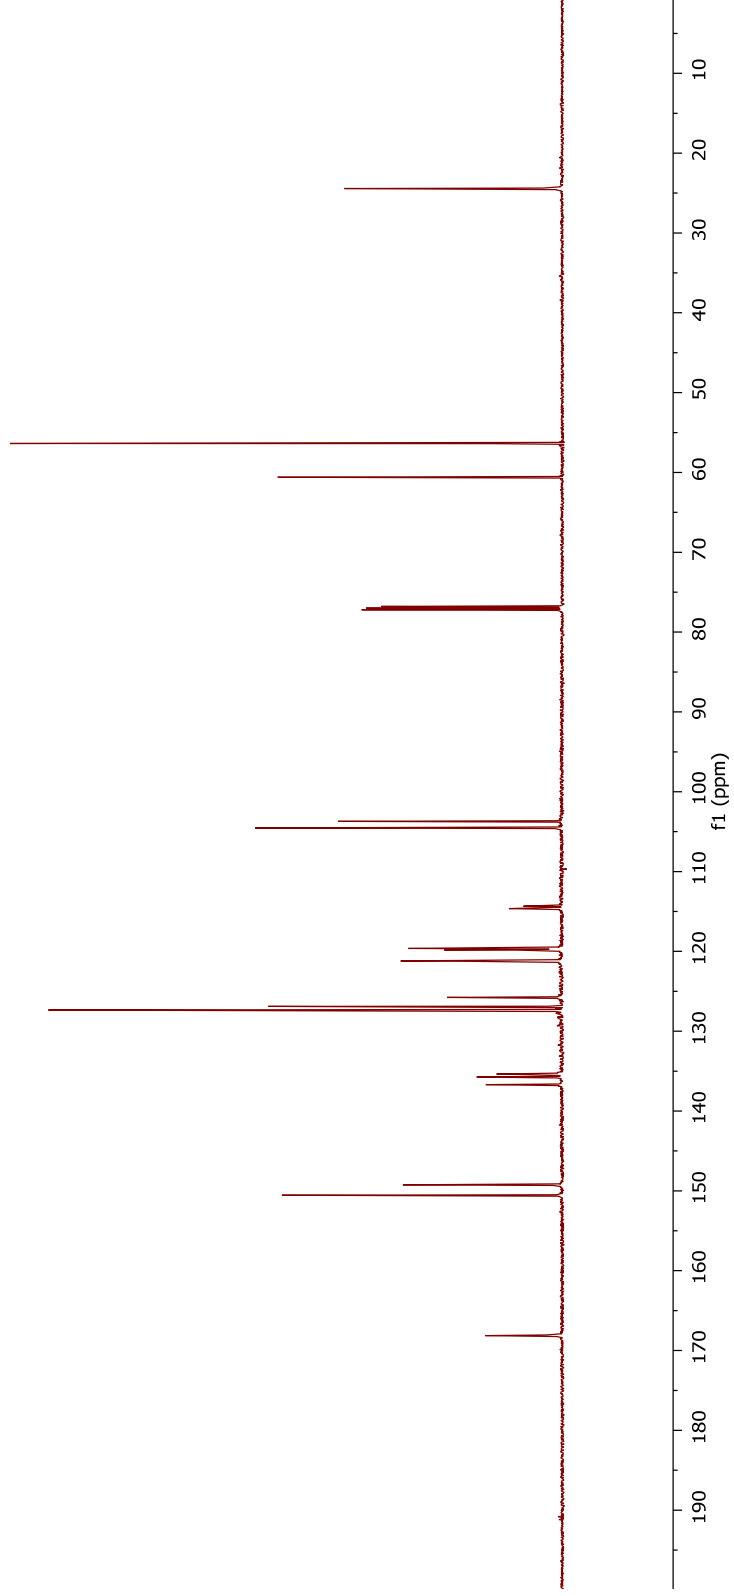

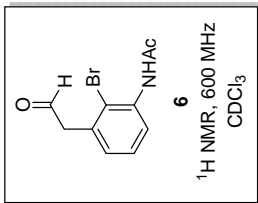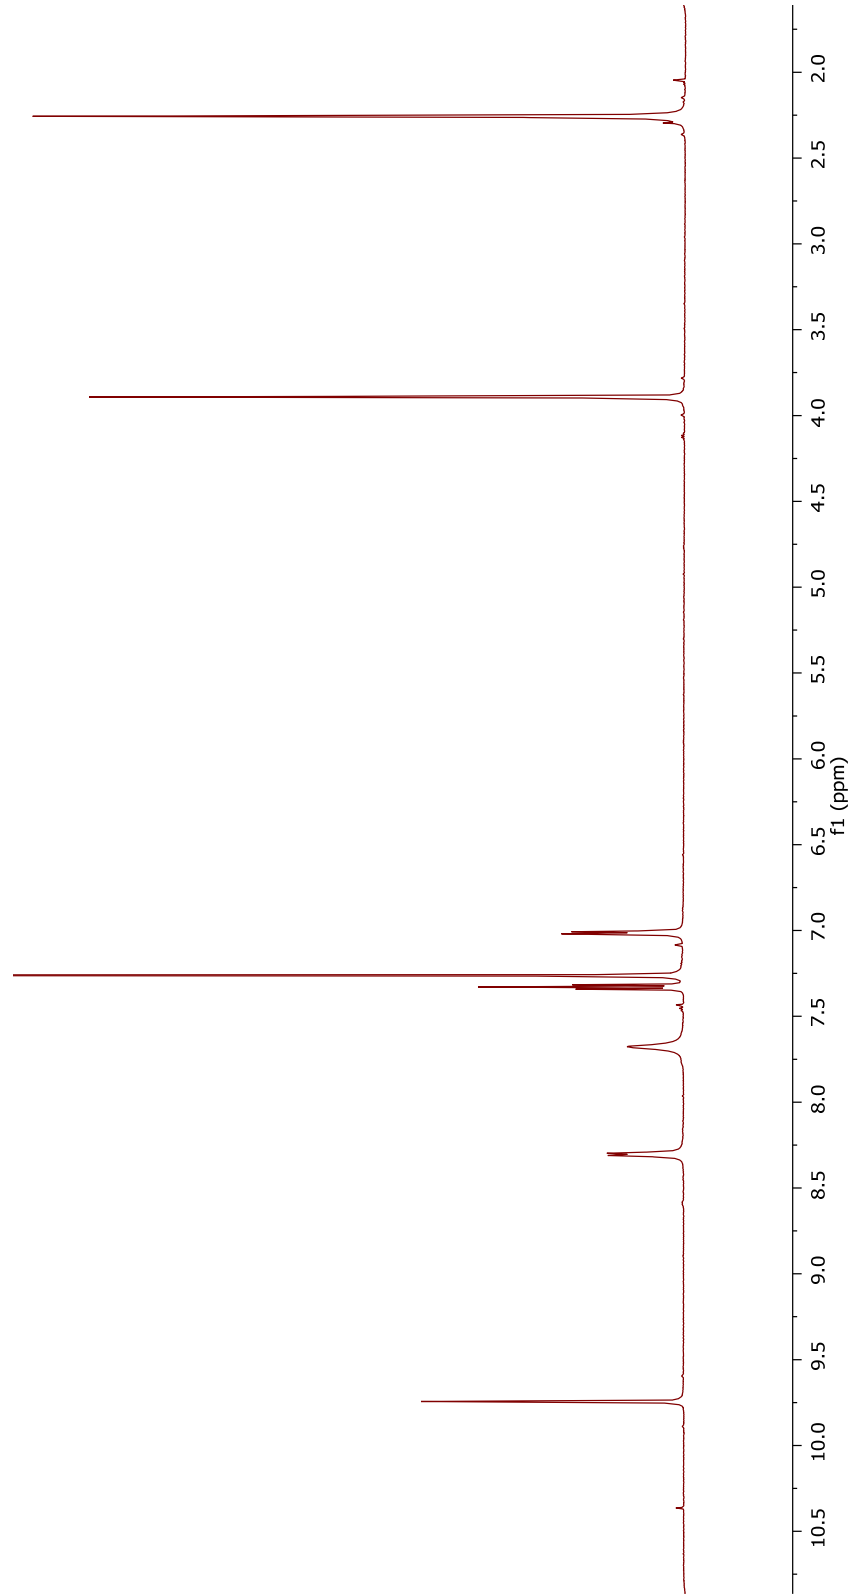



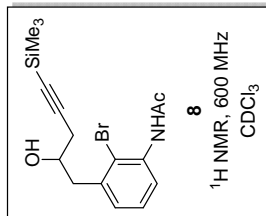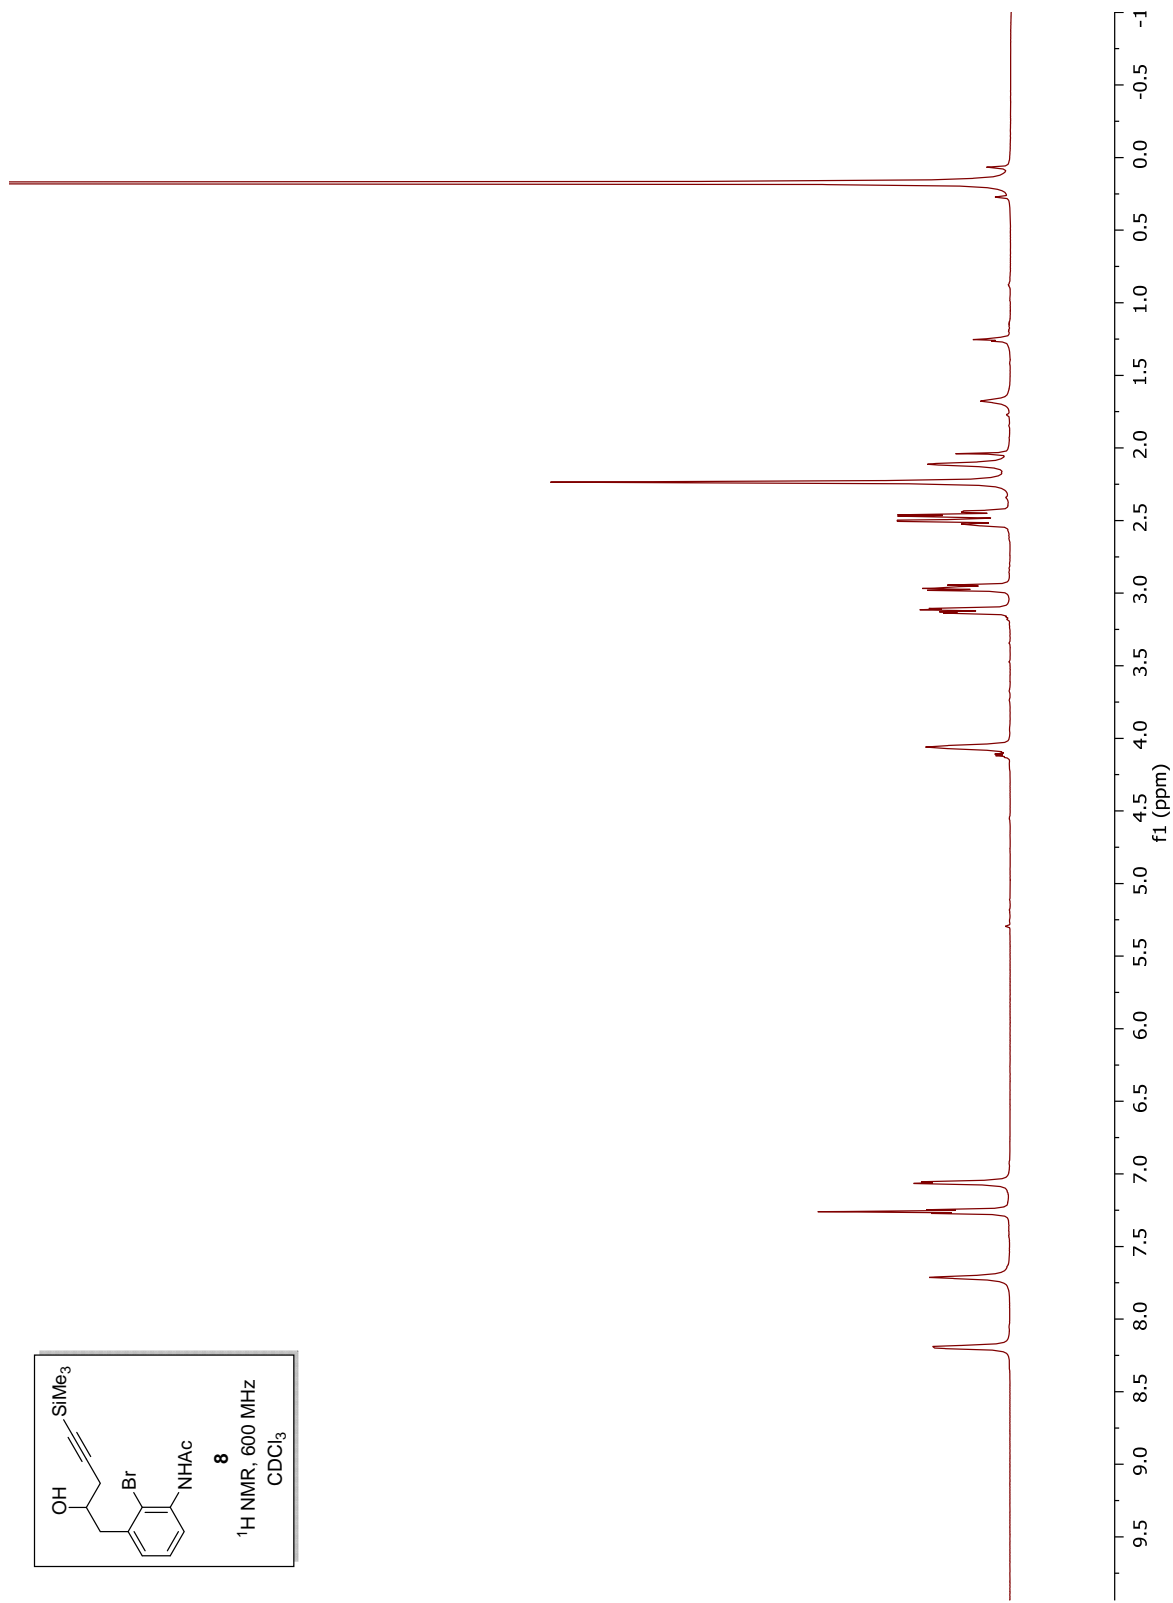



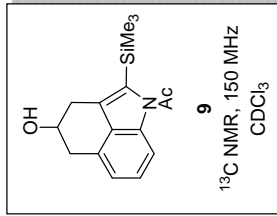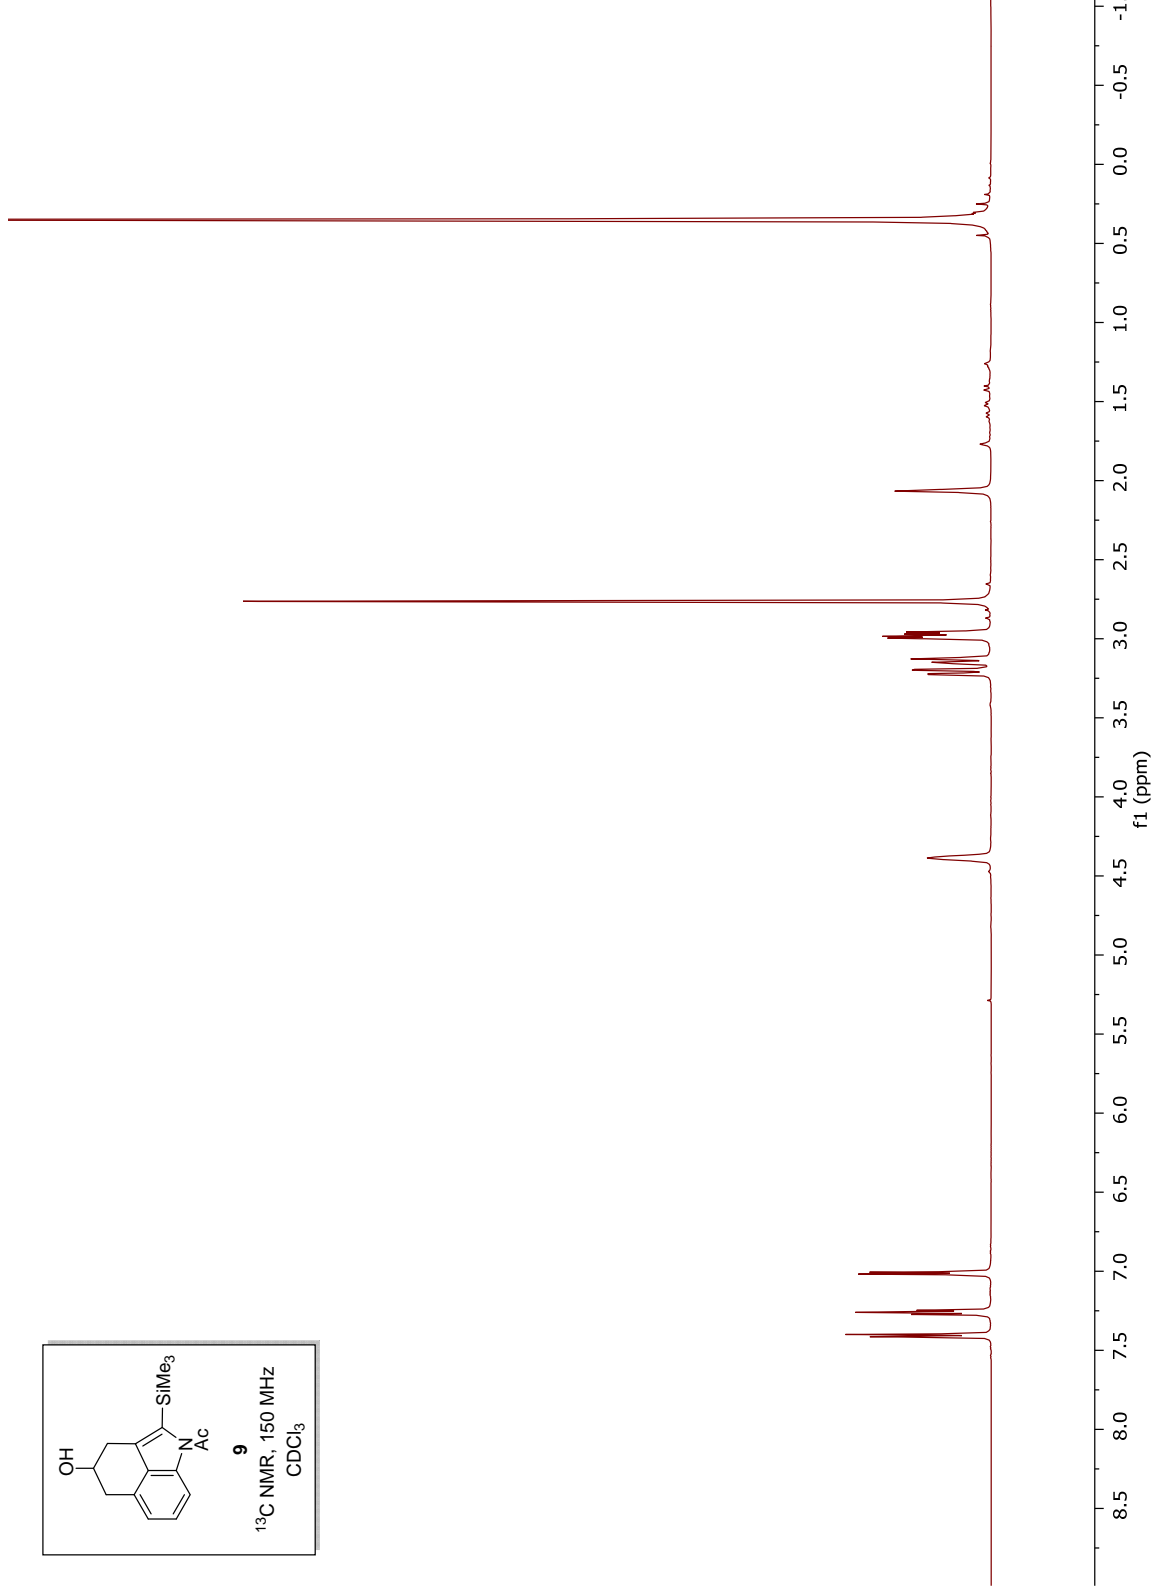

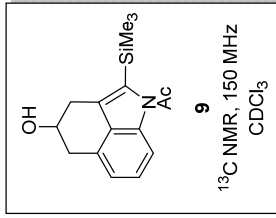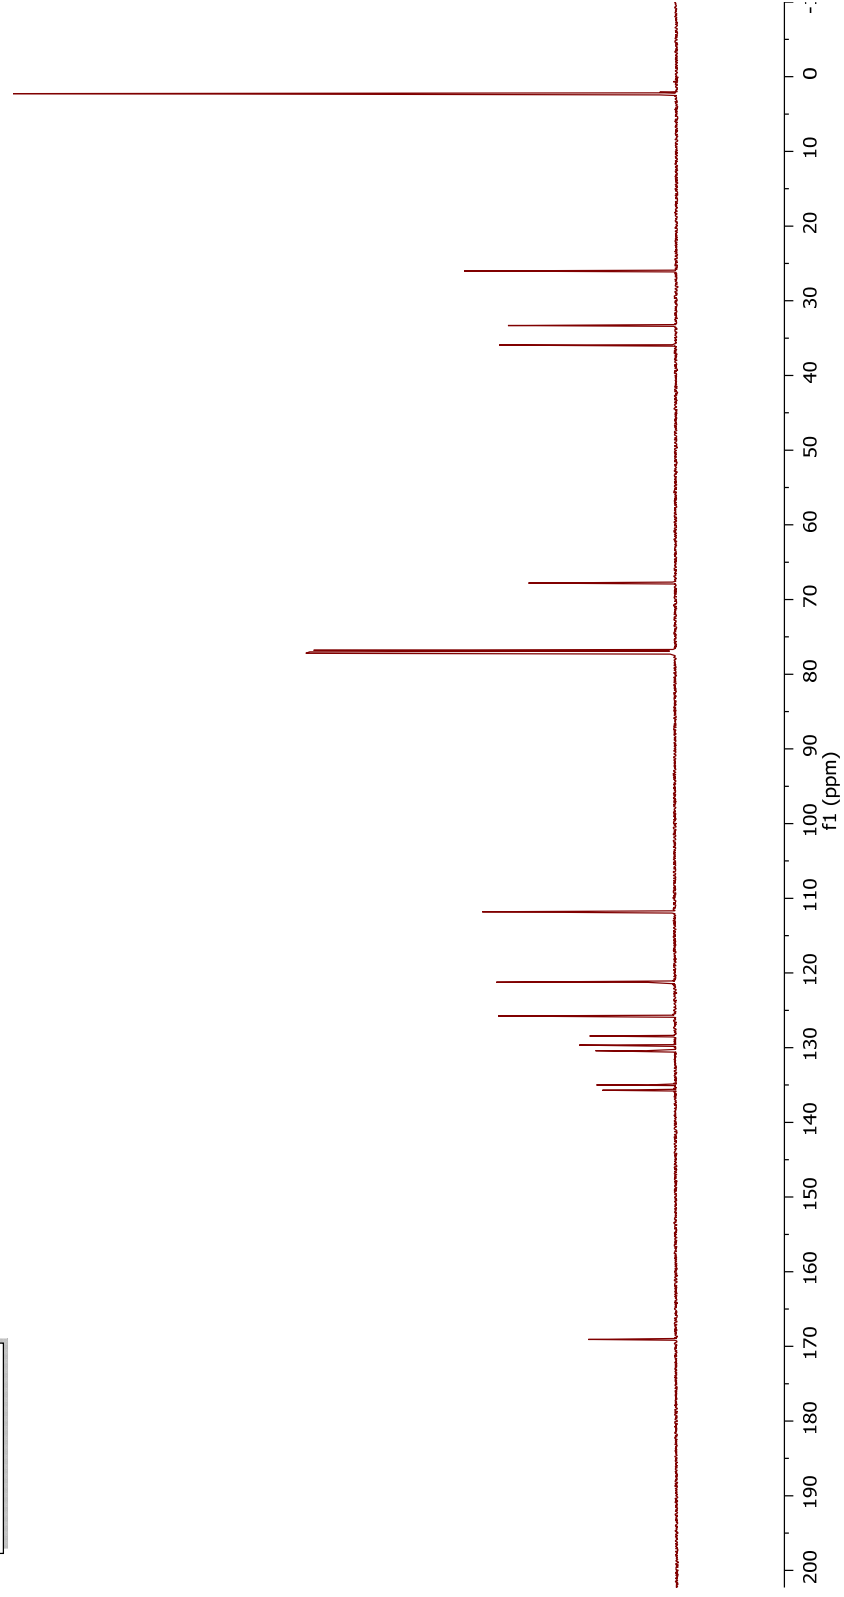

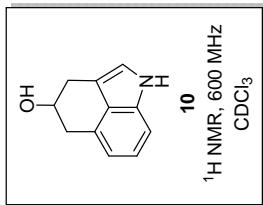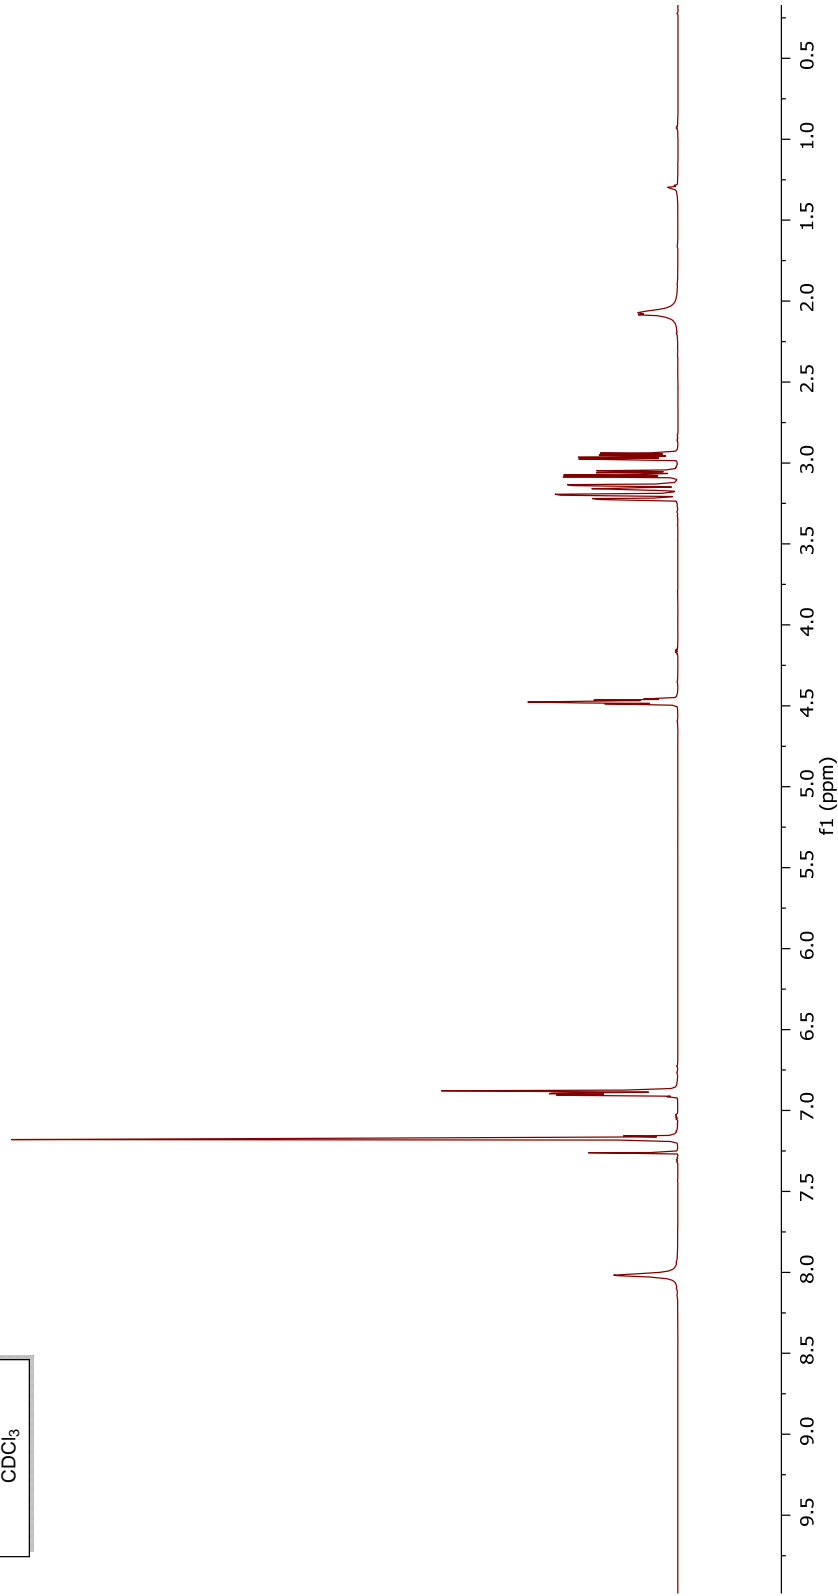

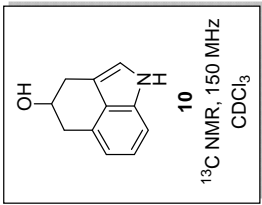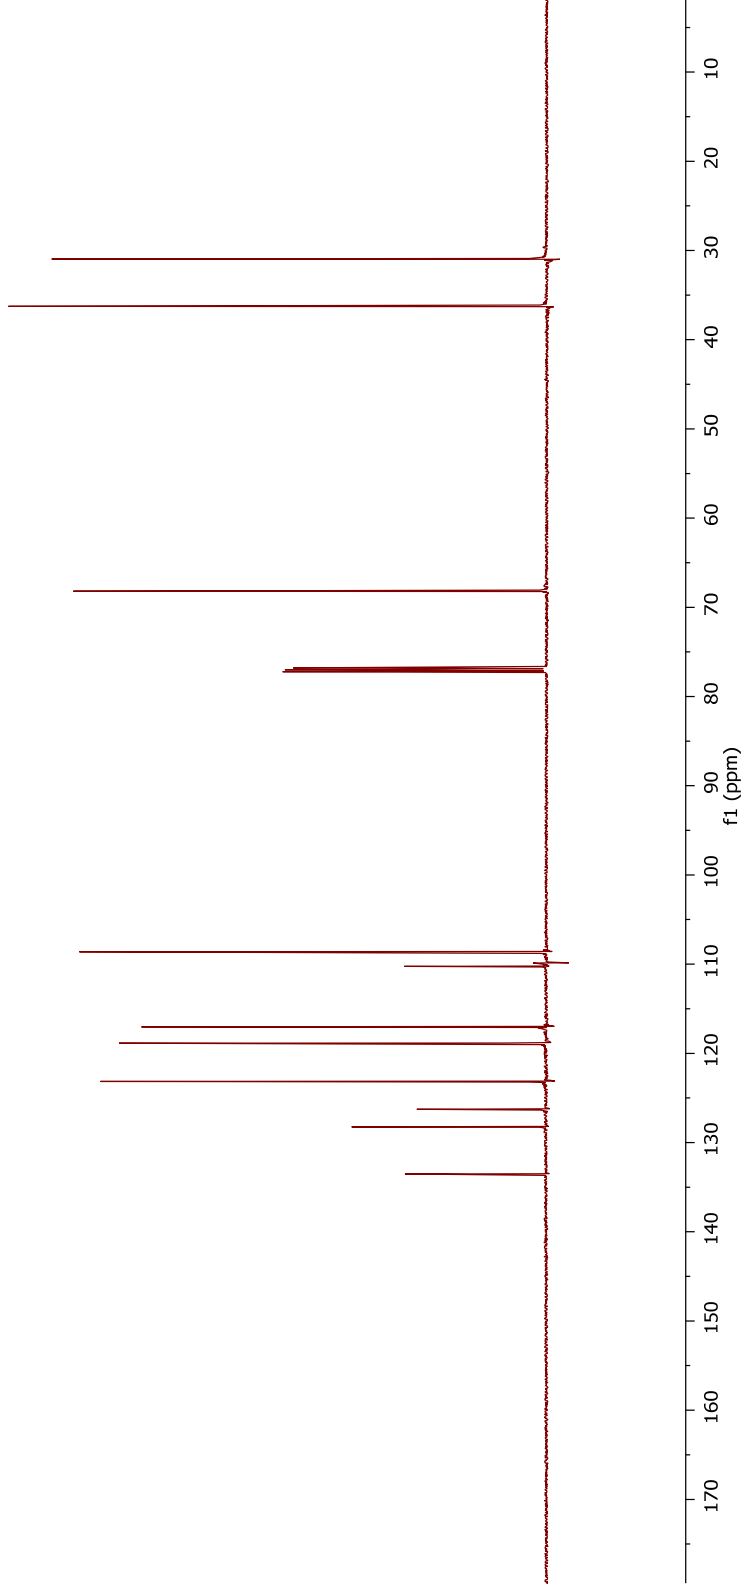



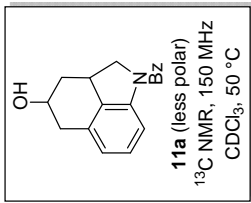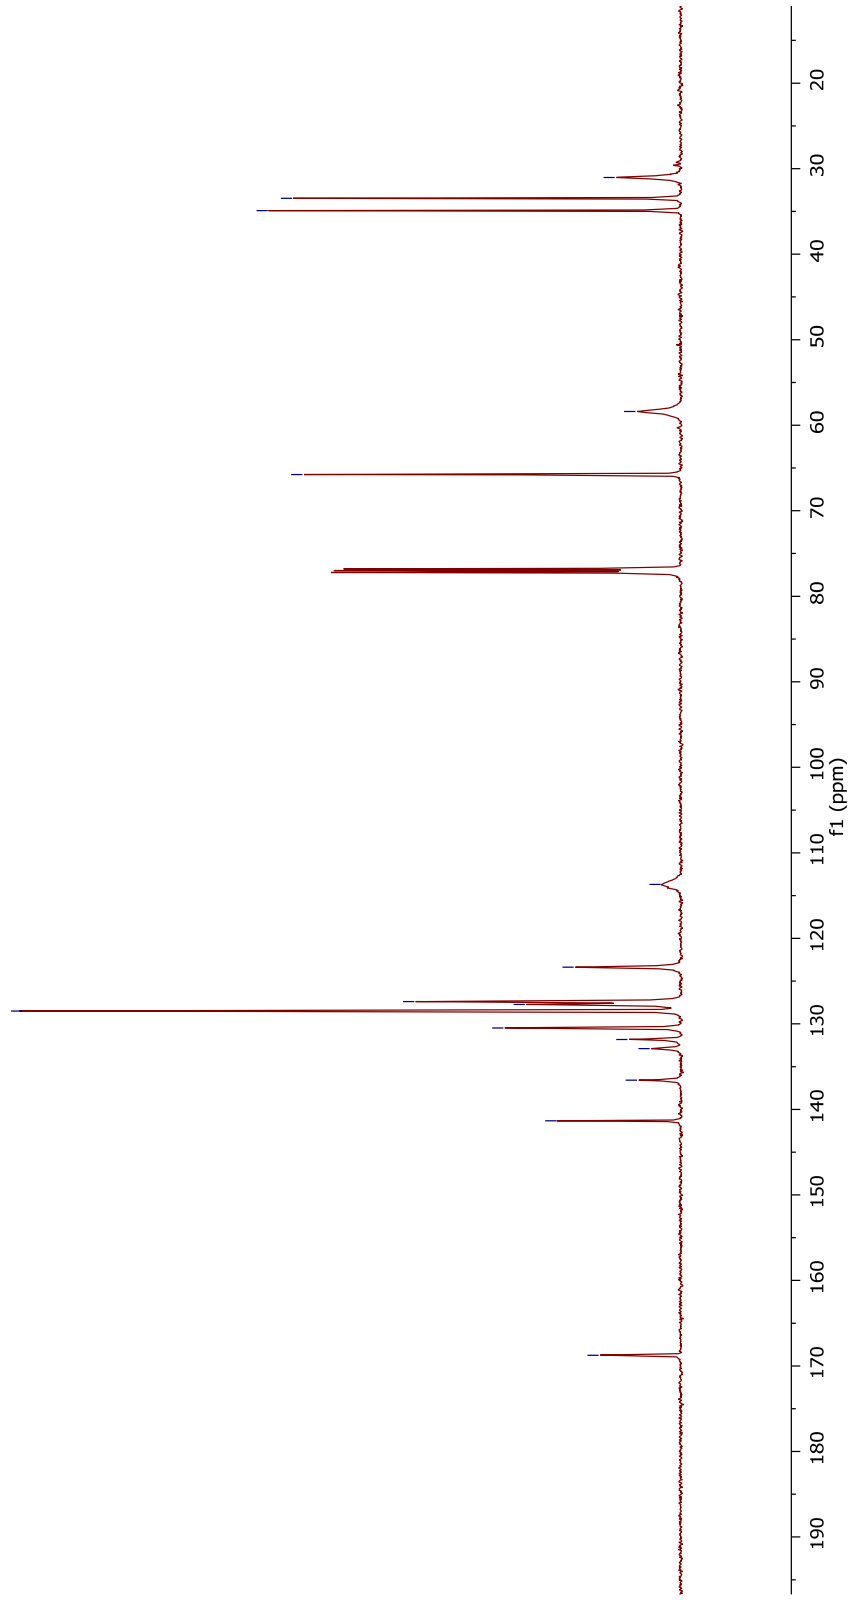



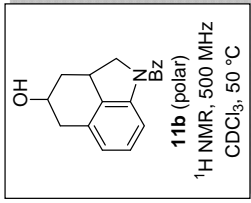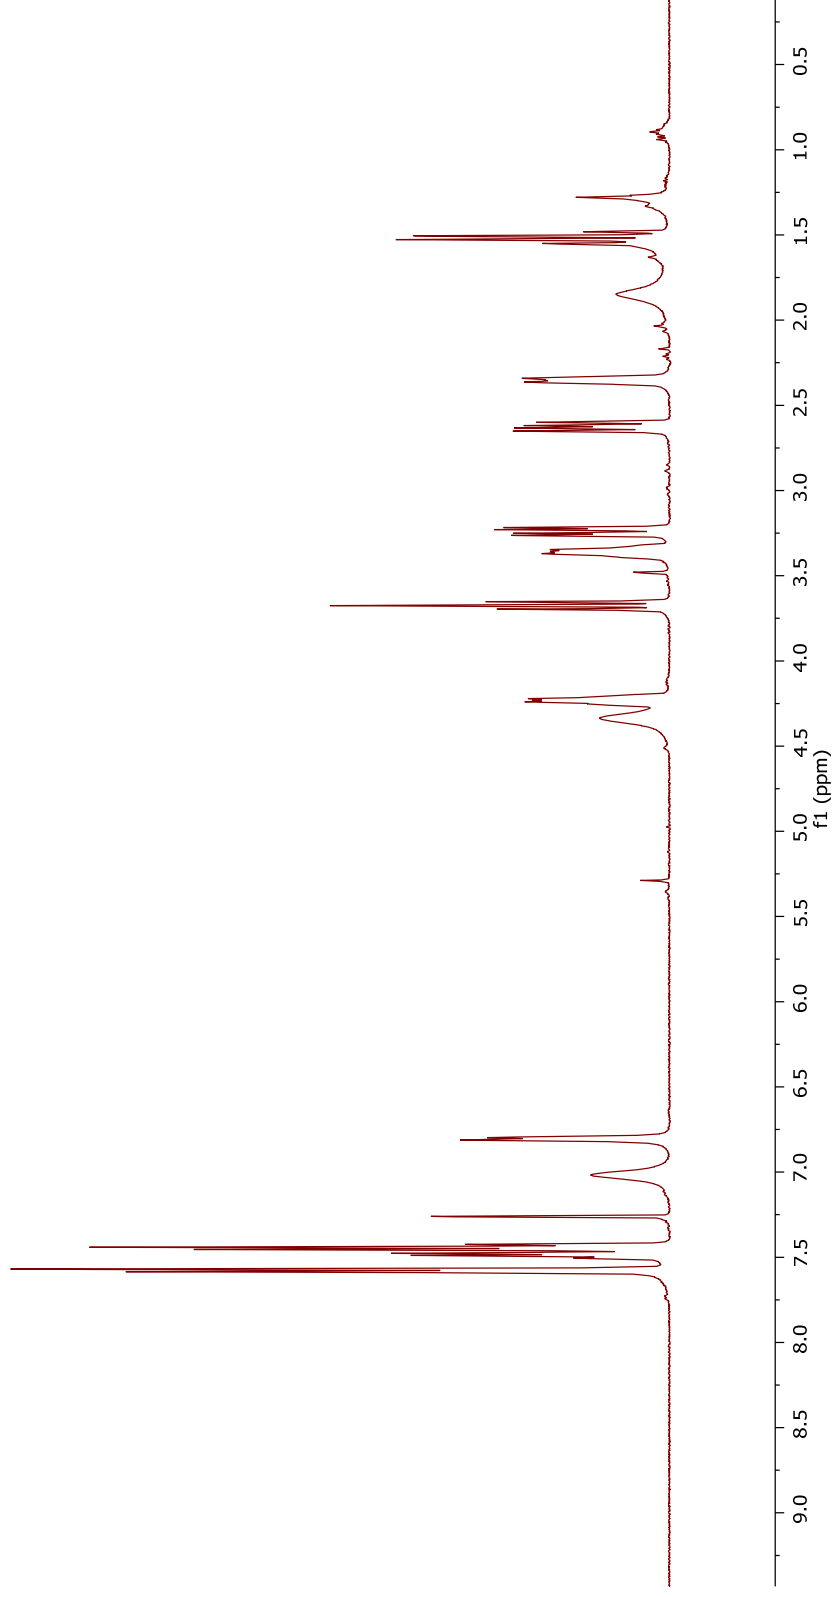

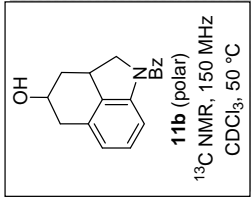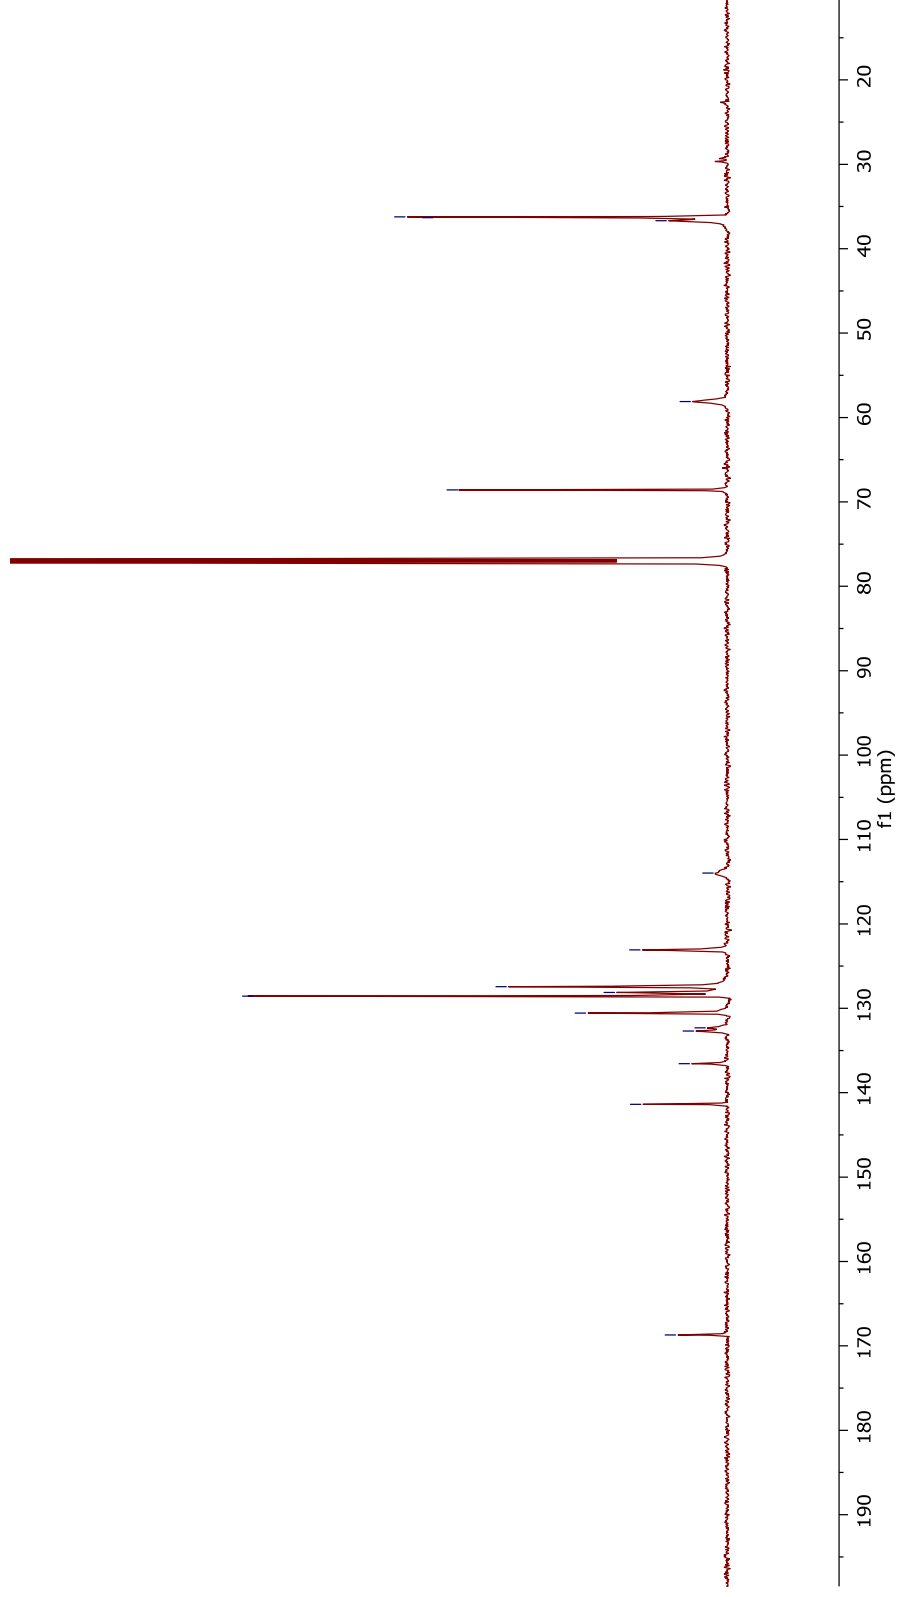

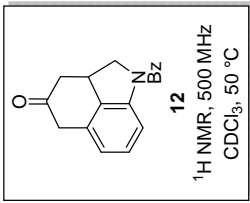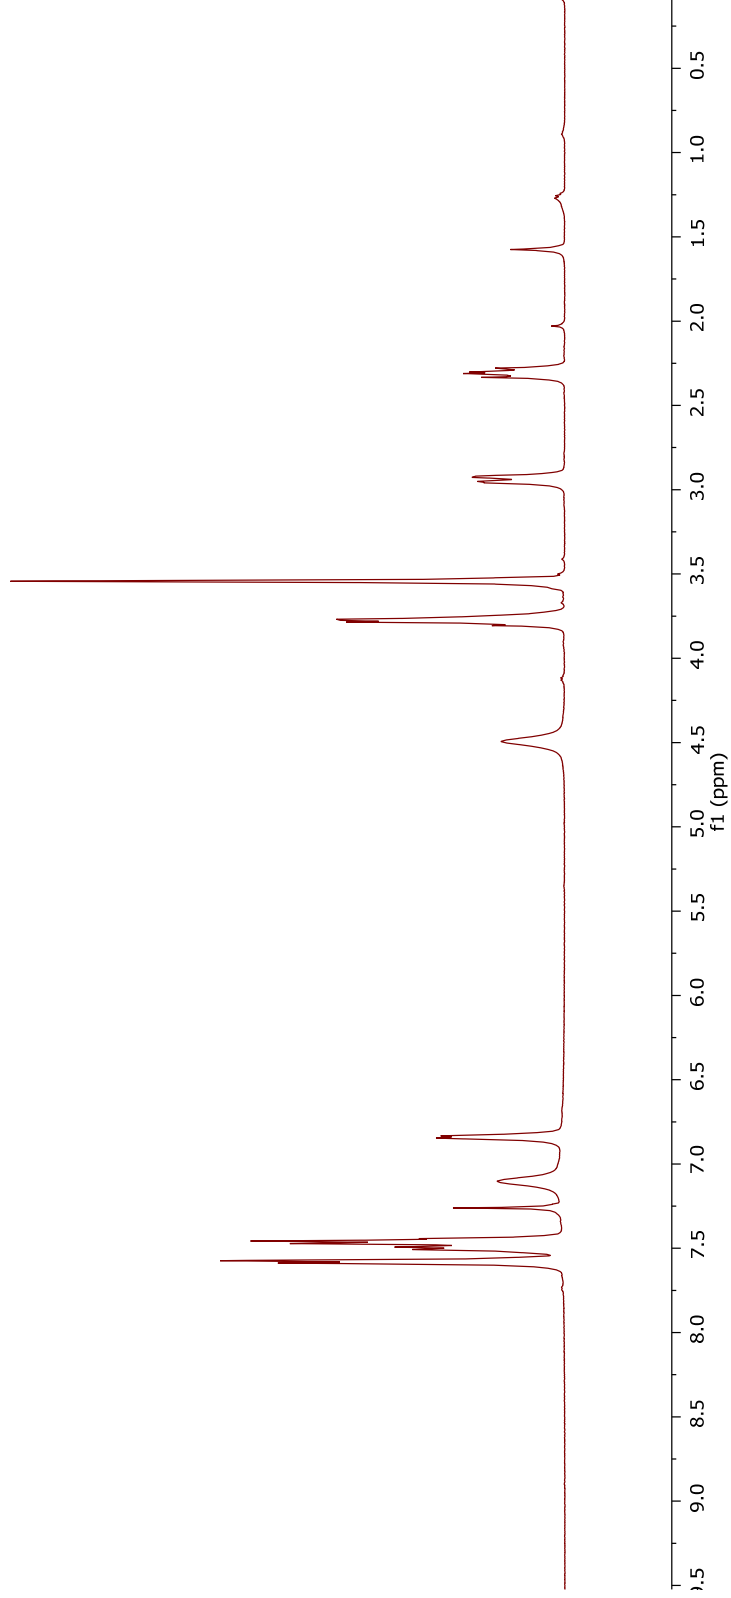

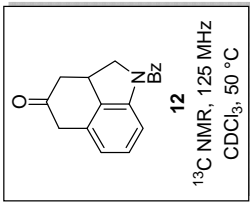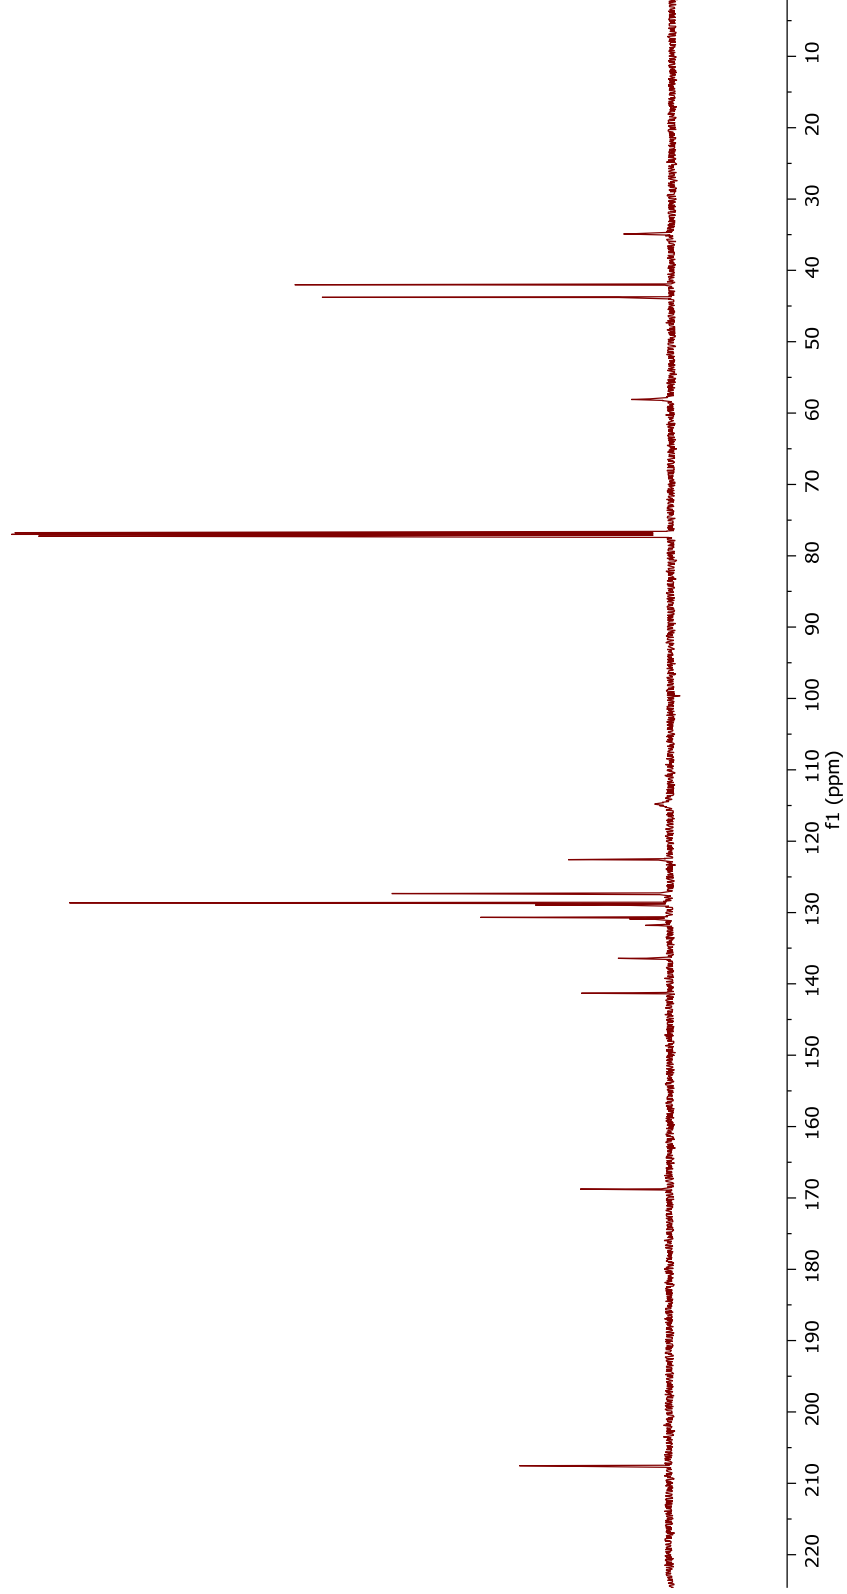

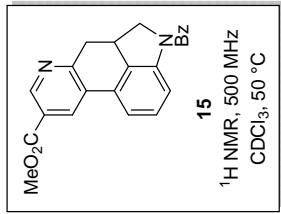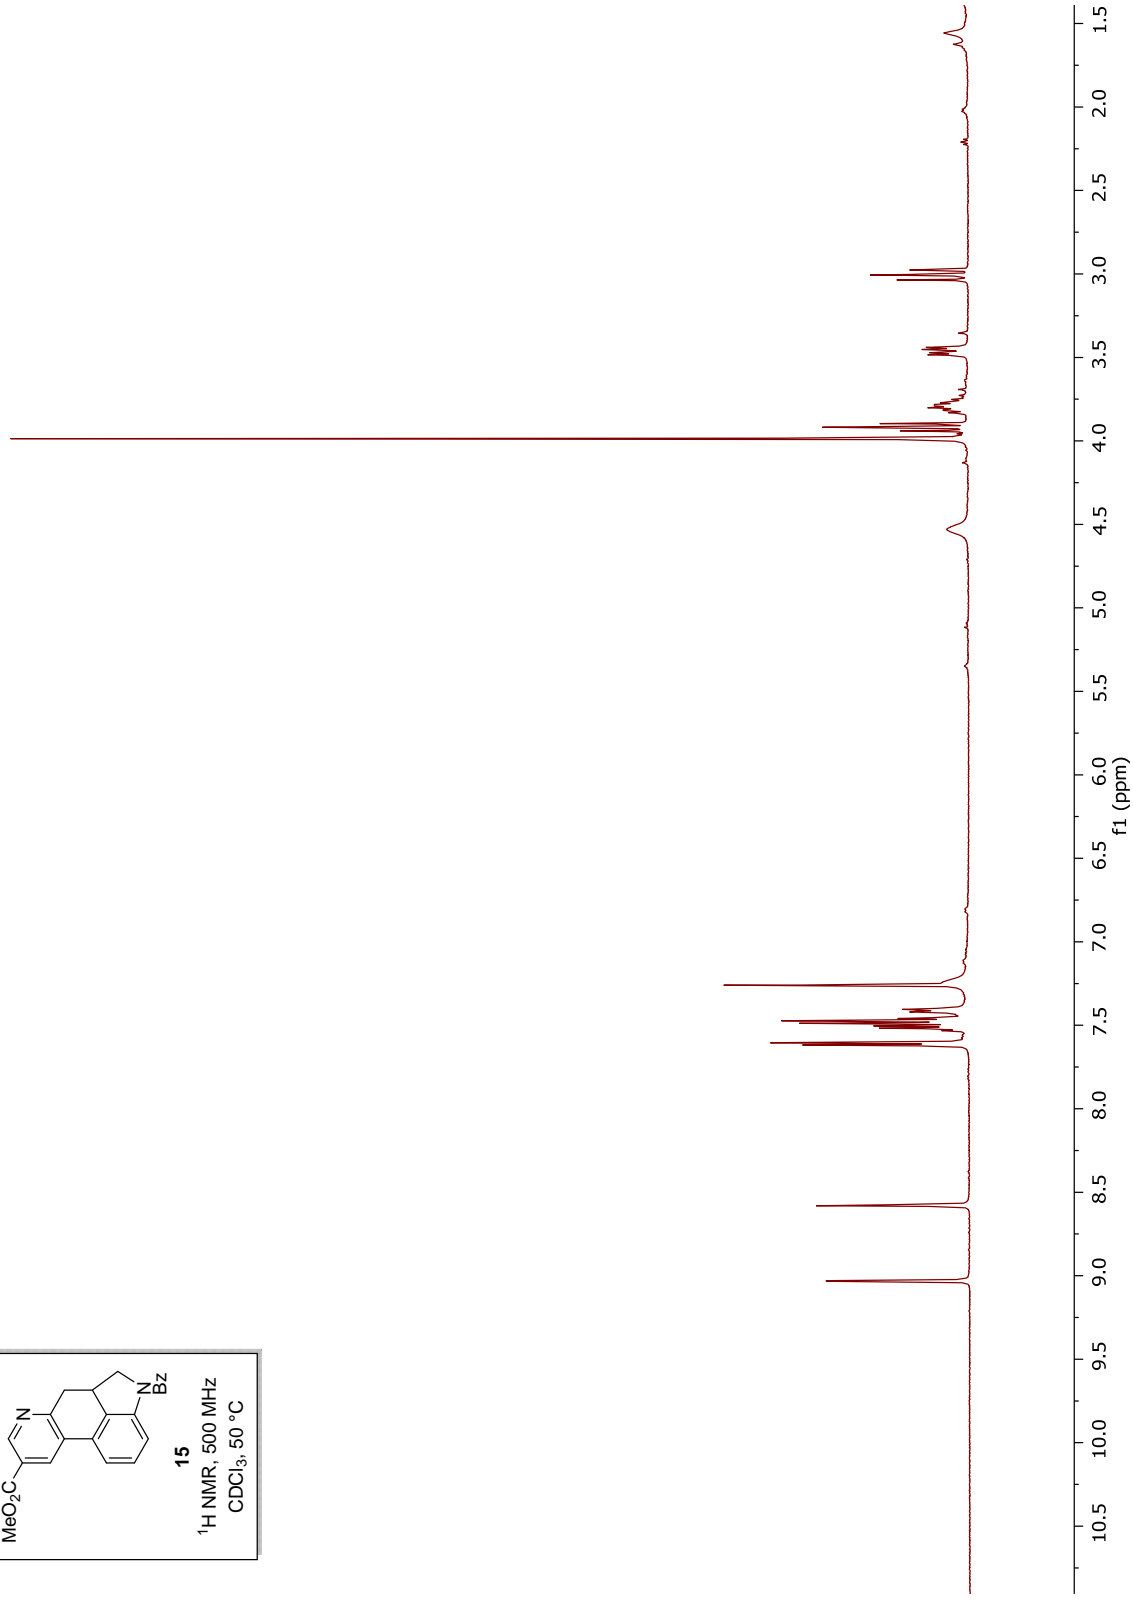

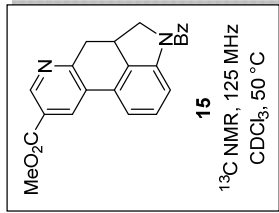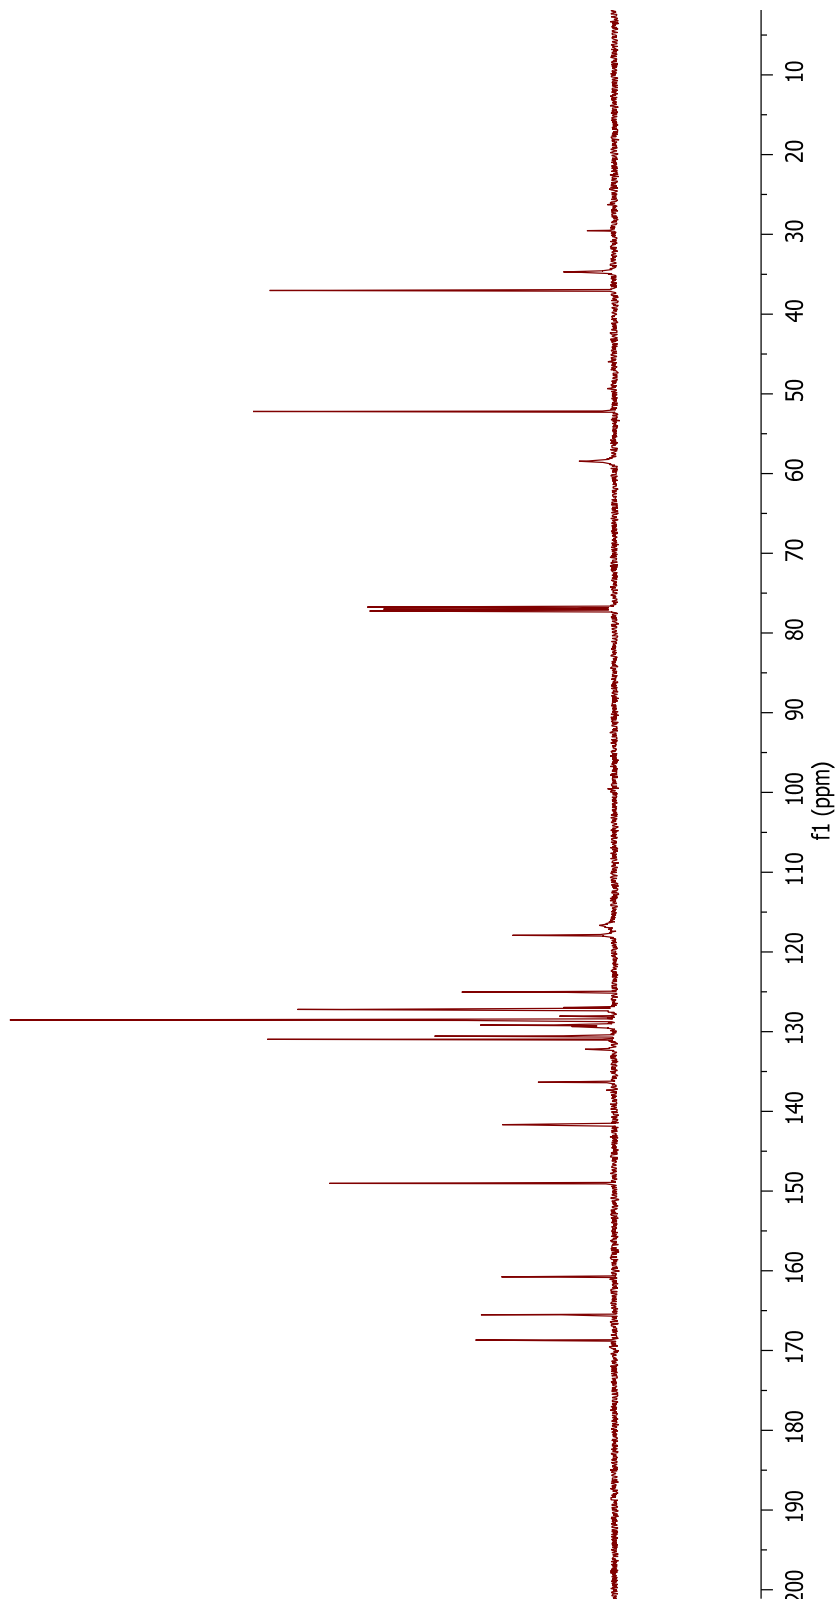



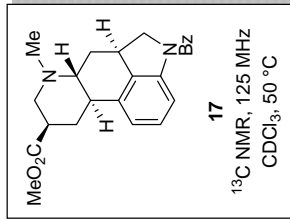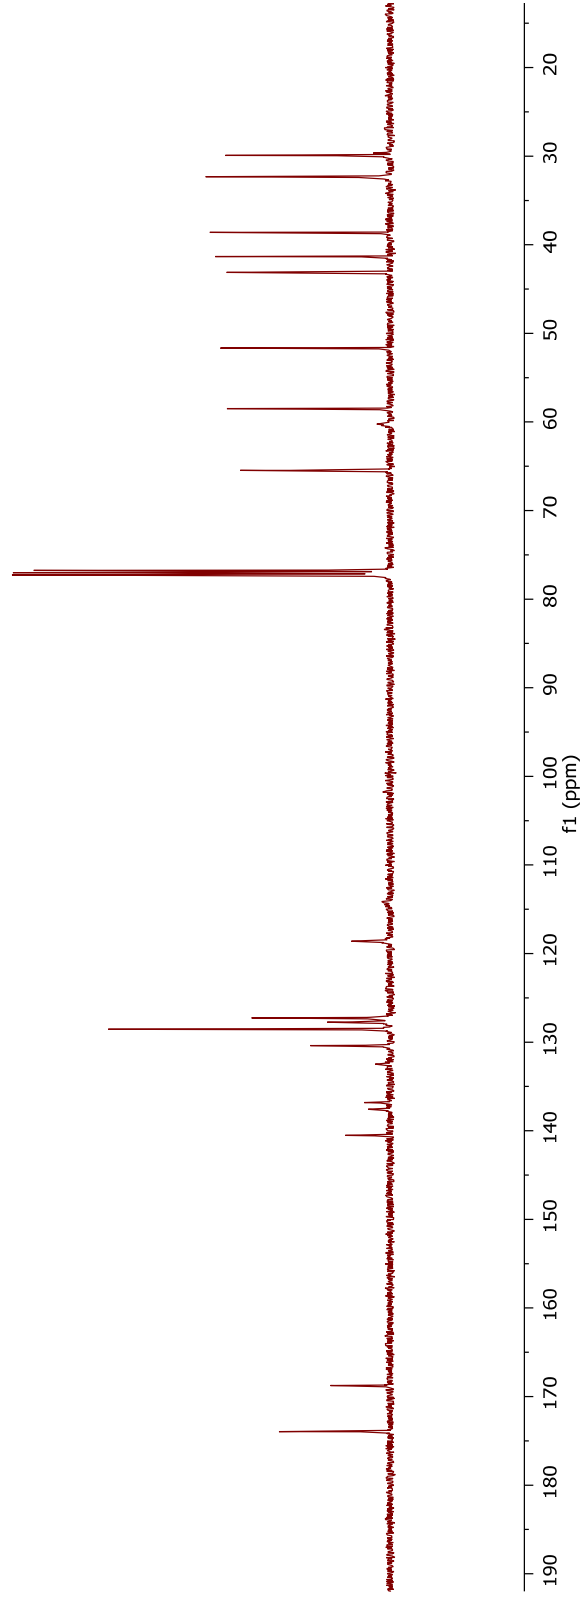



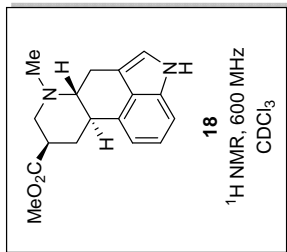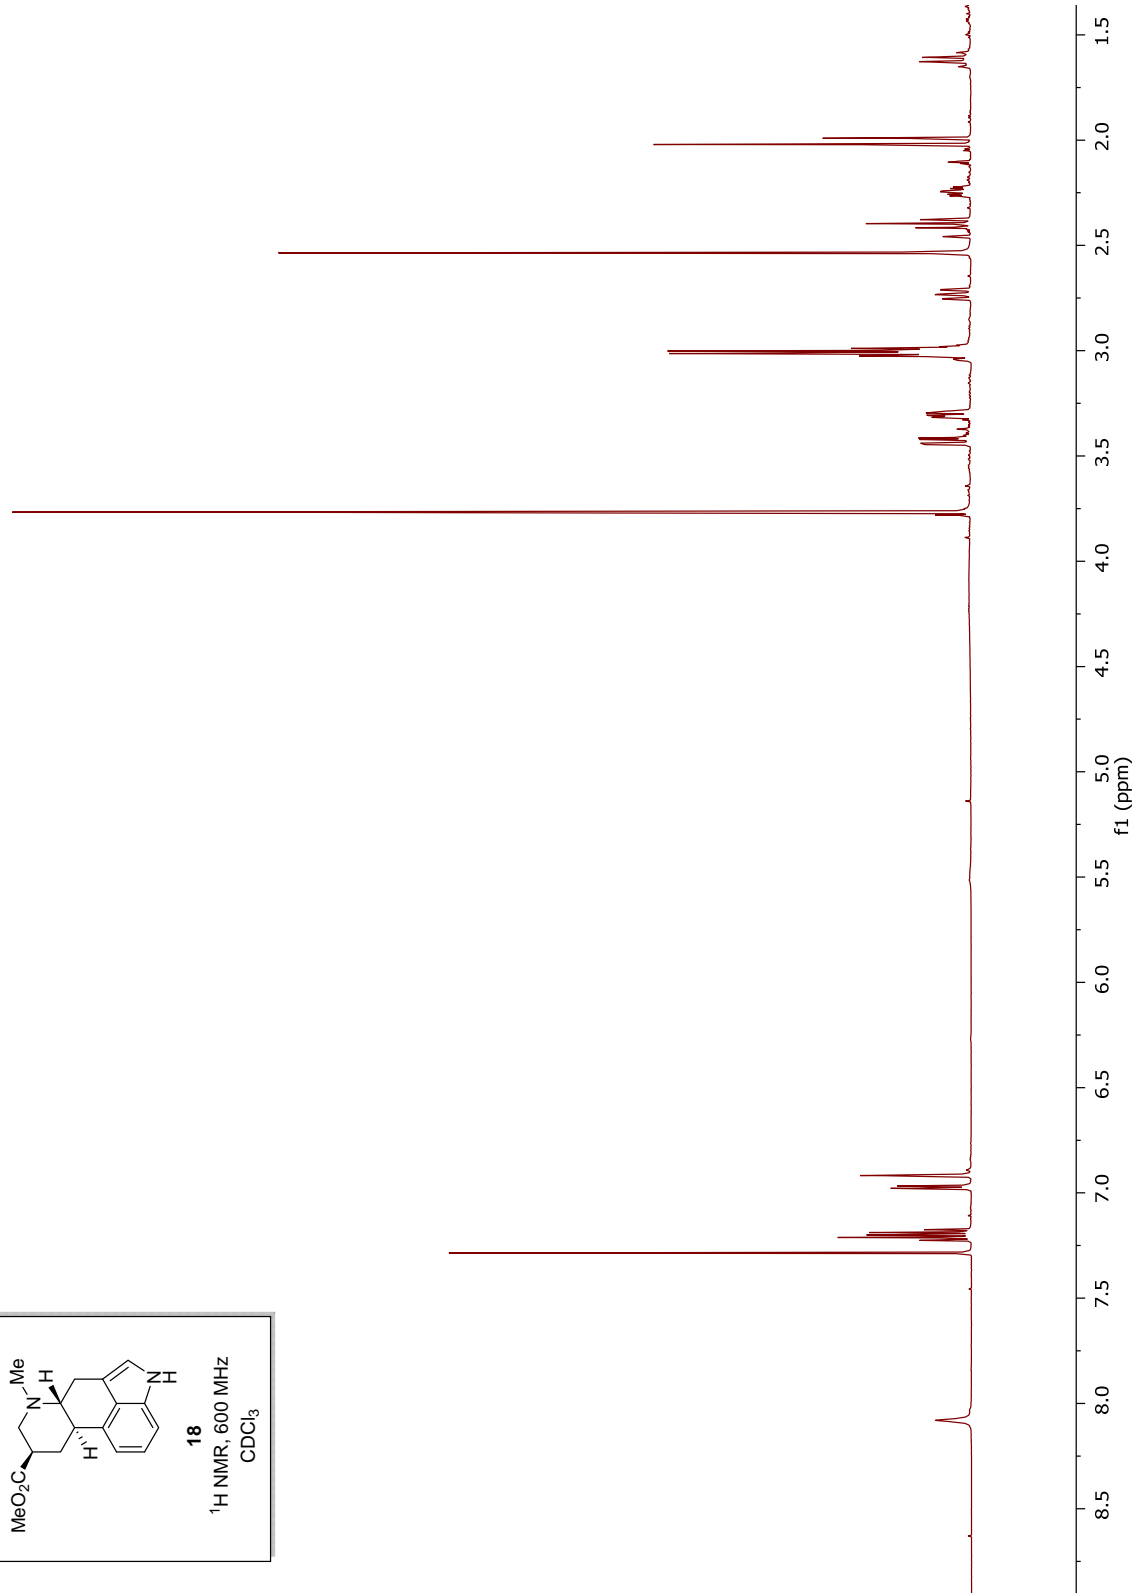

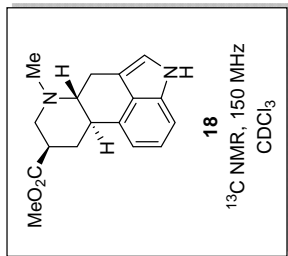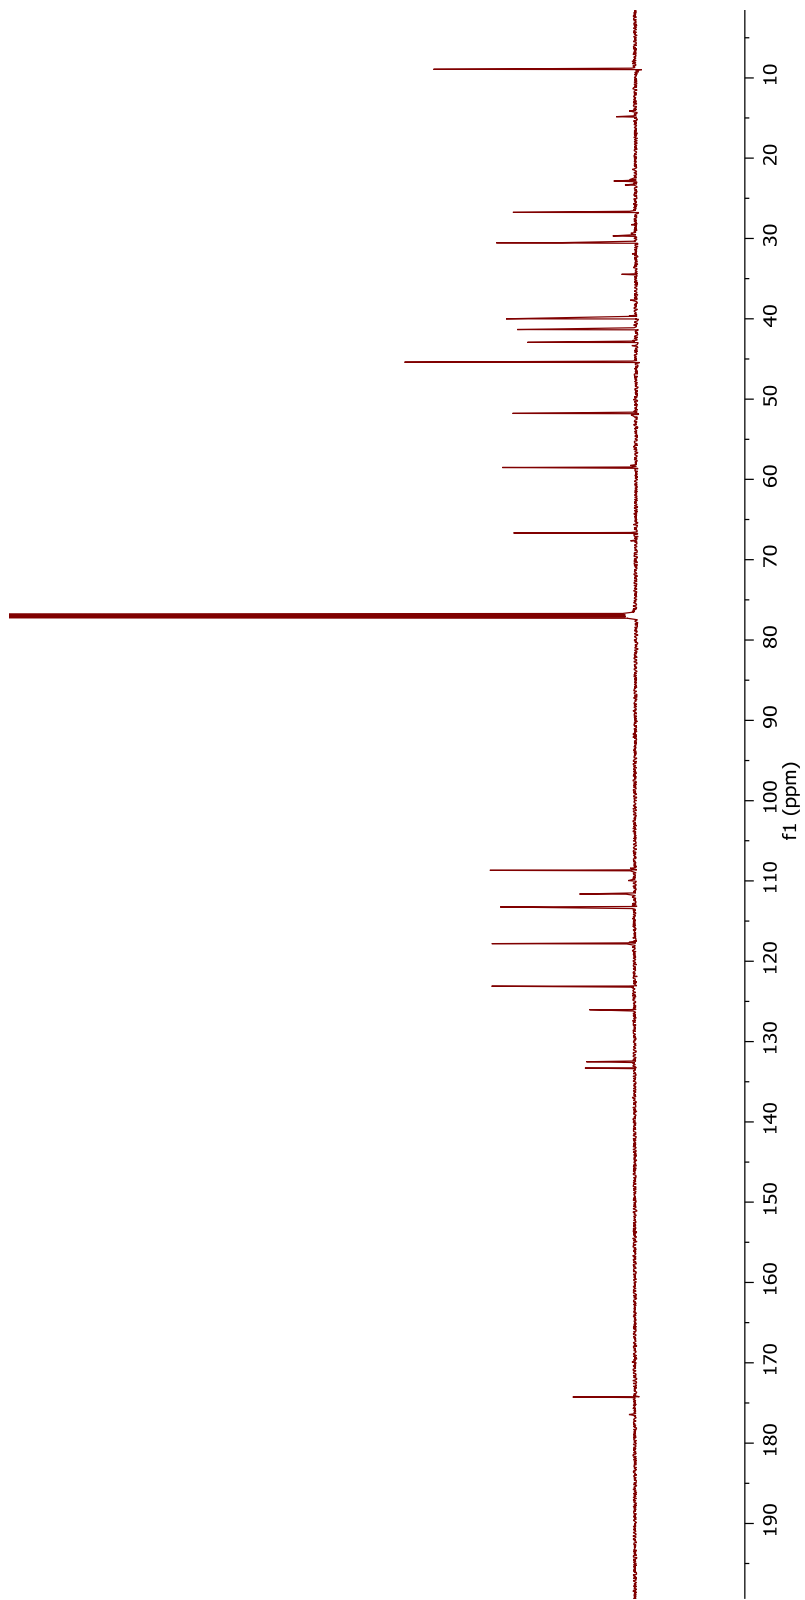

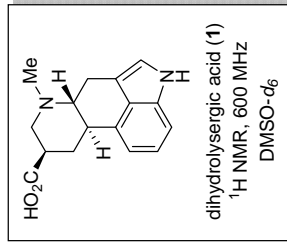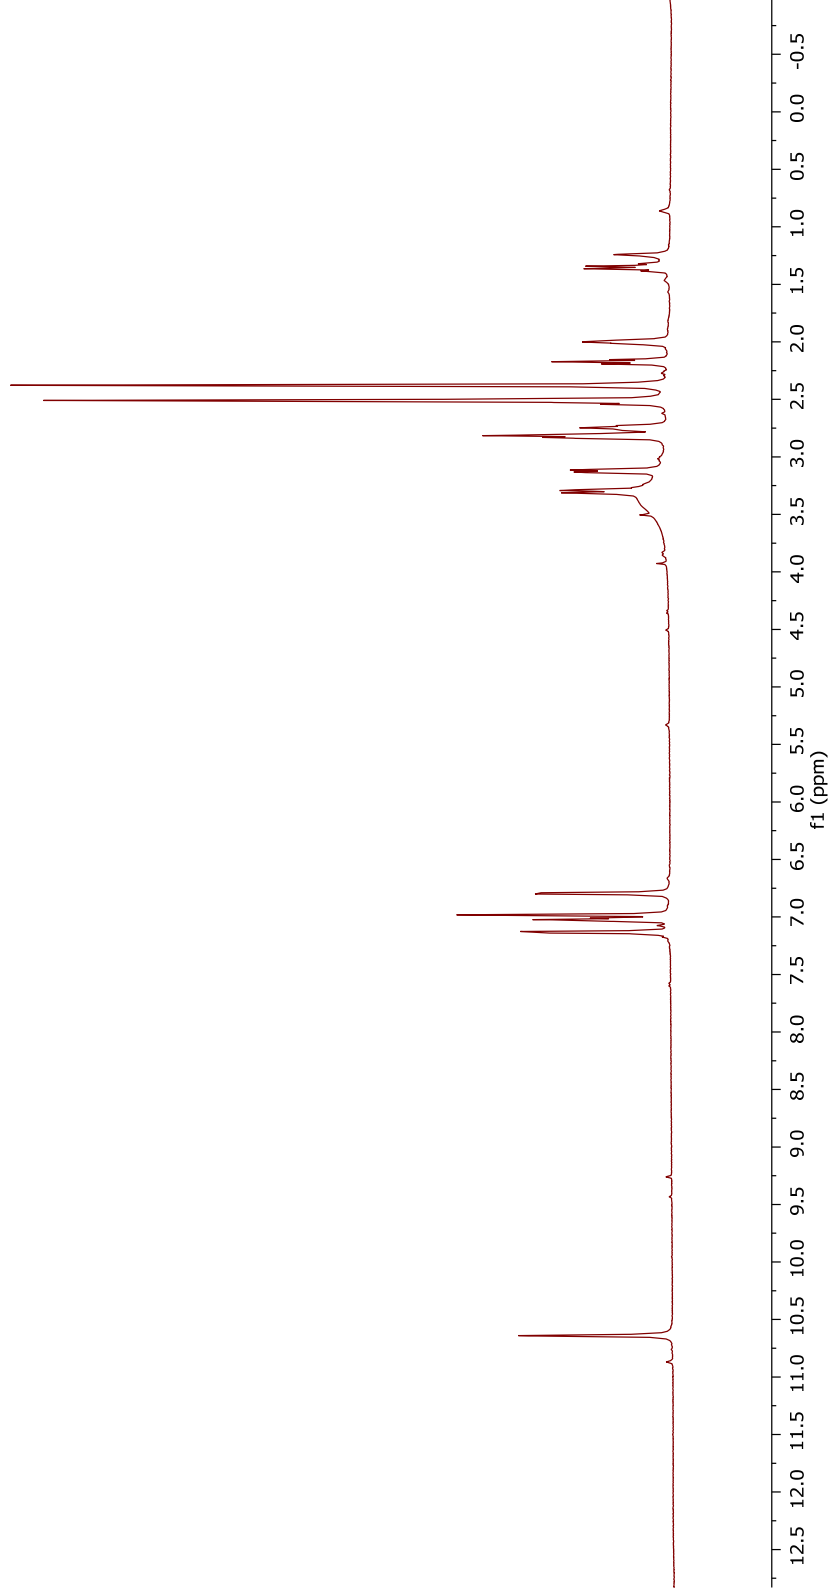

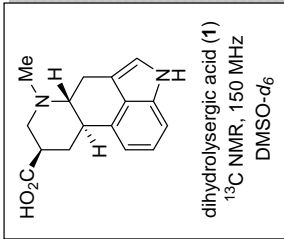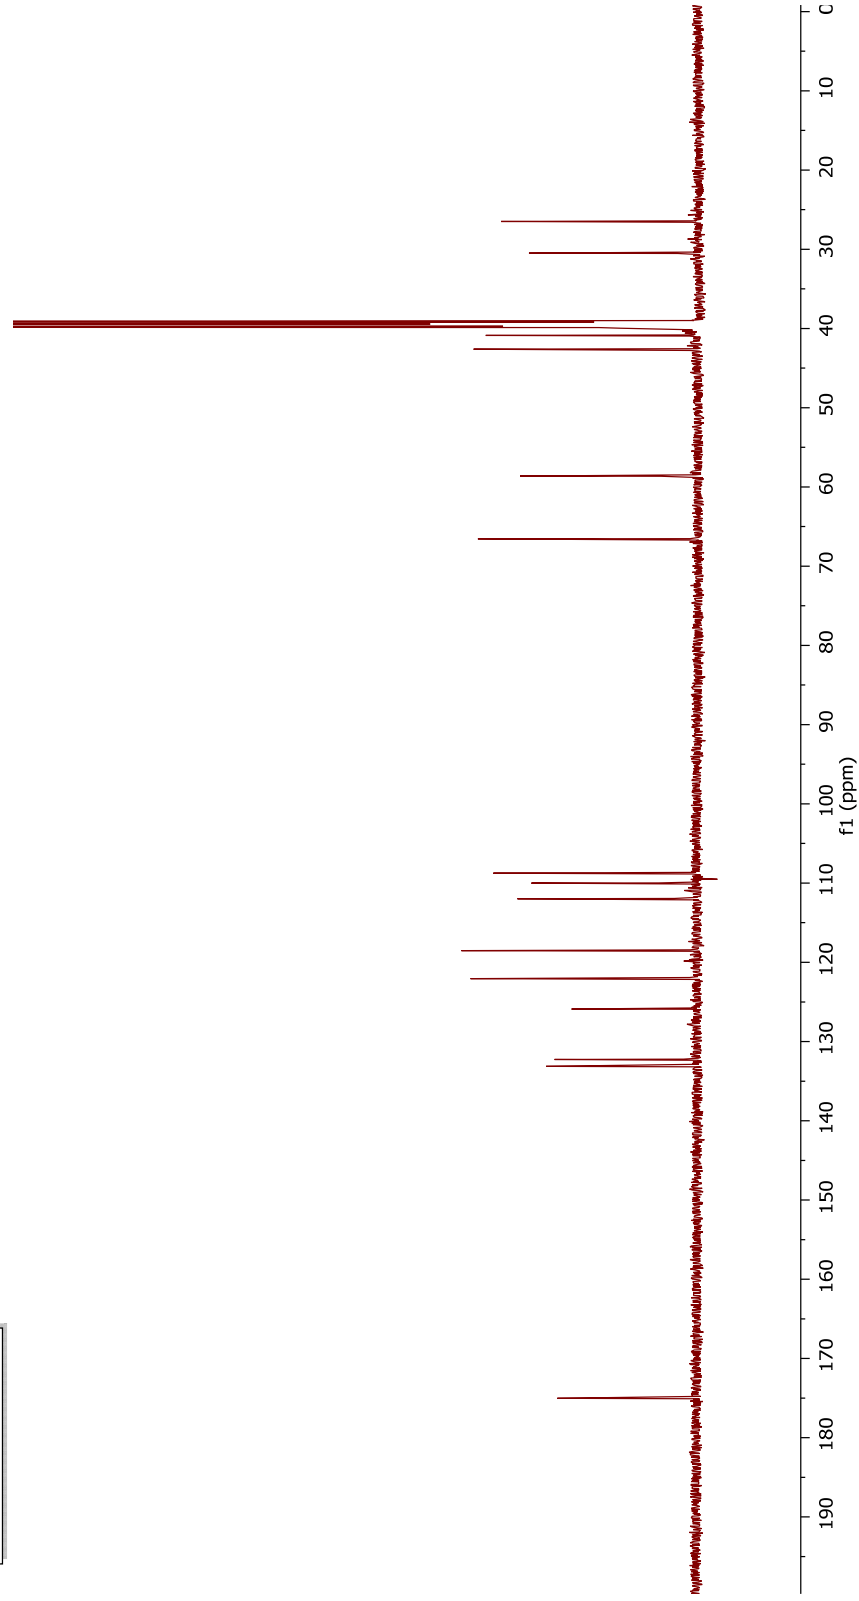

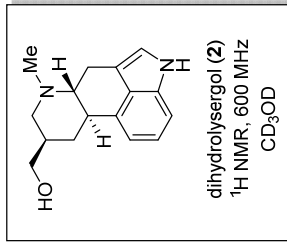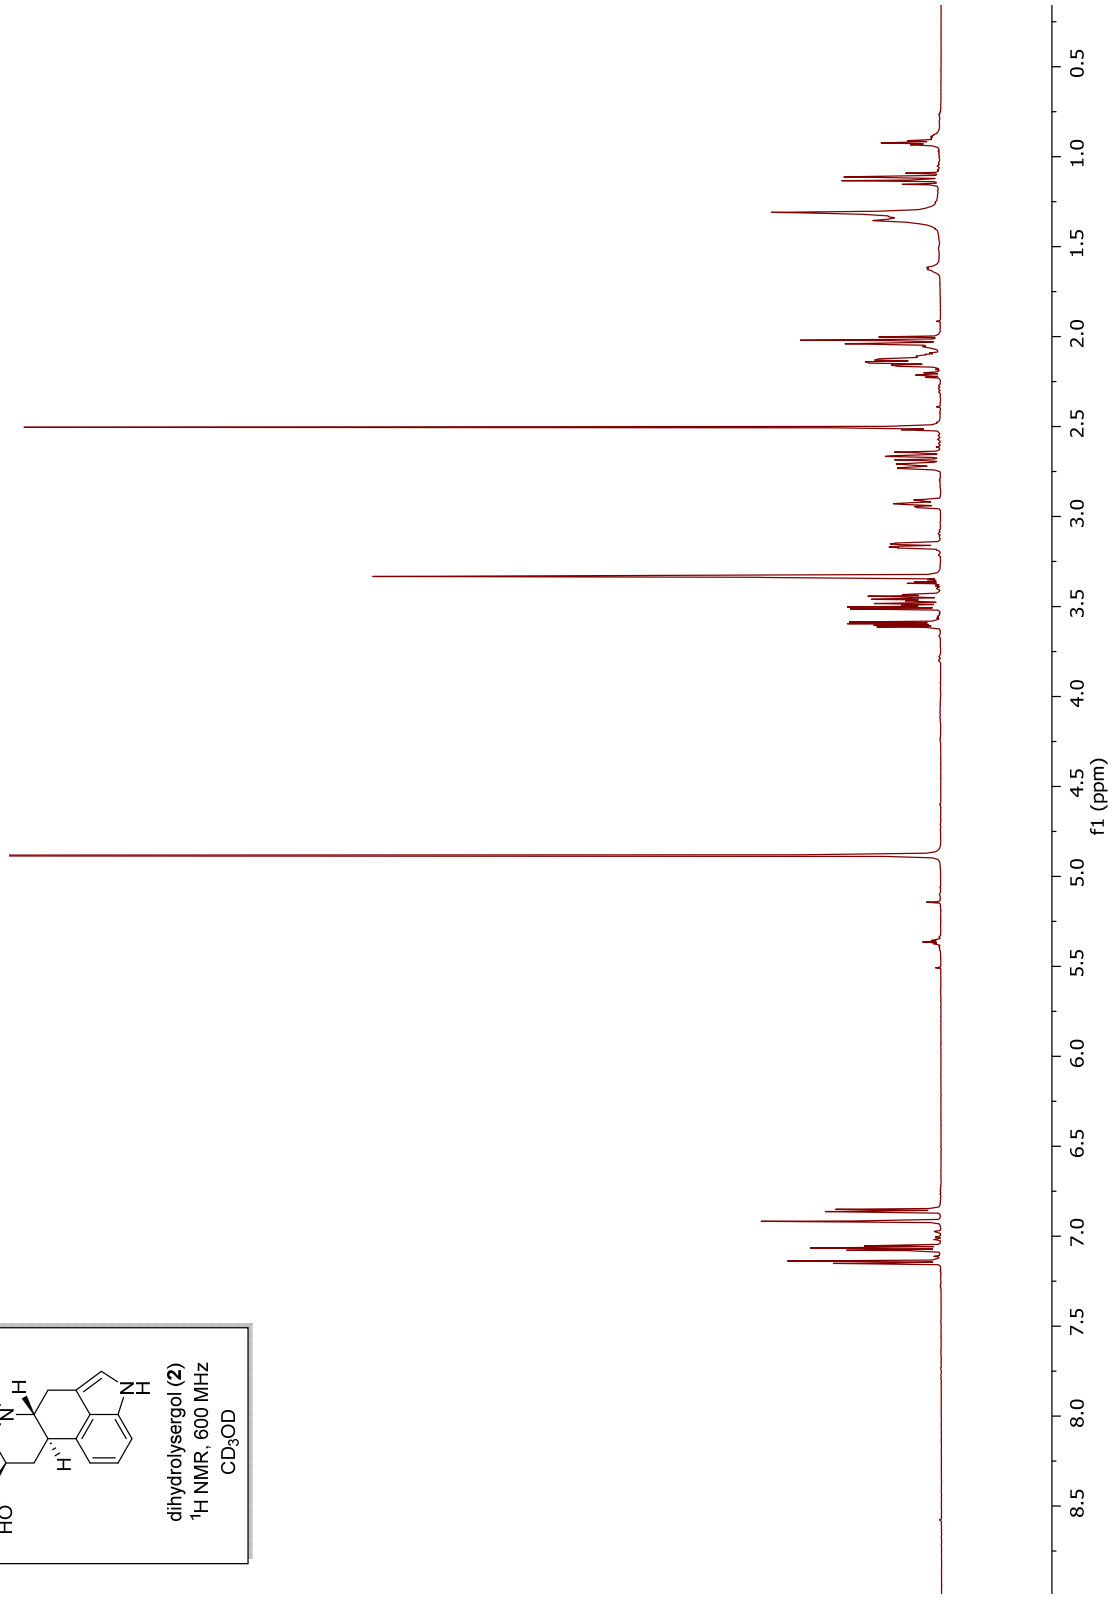

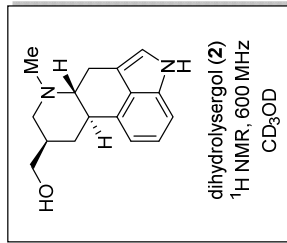

A sample of authentic 2  
<sup>1</sup>H NMR, 600 MHz, CD<sub>3</sub>OD

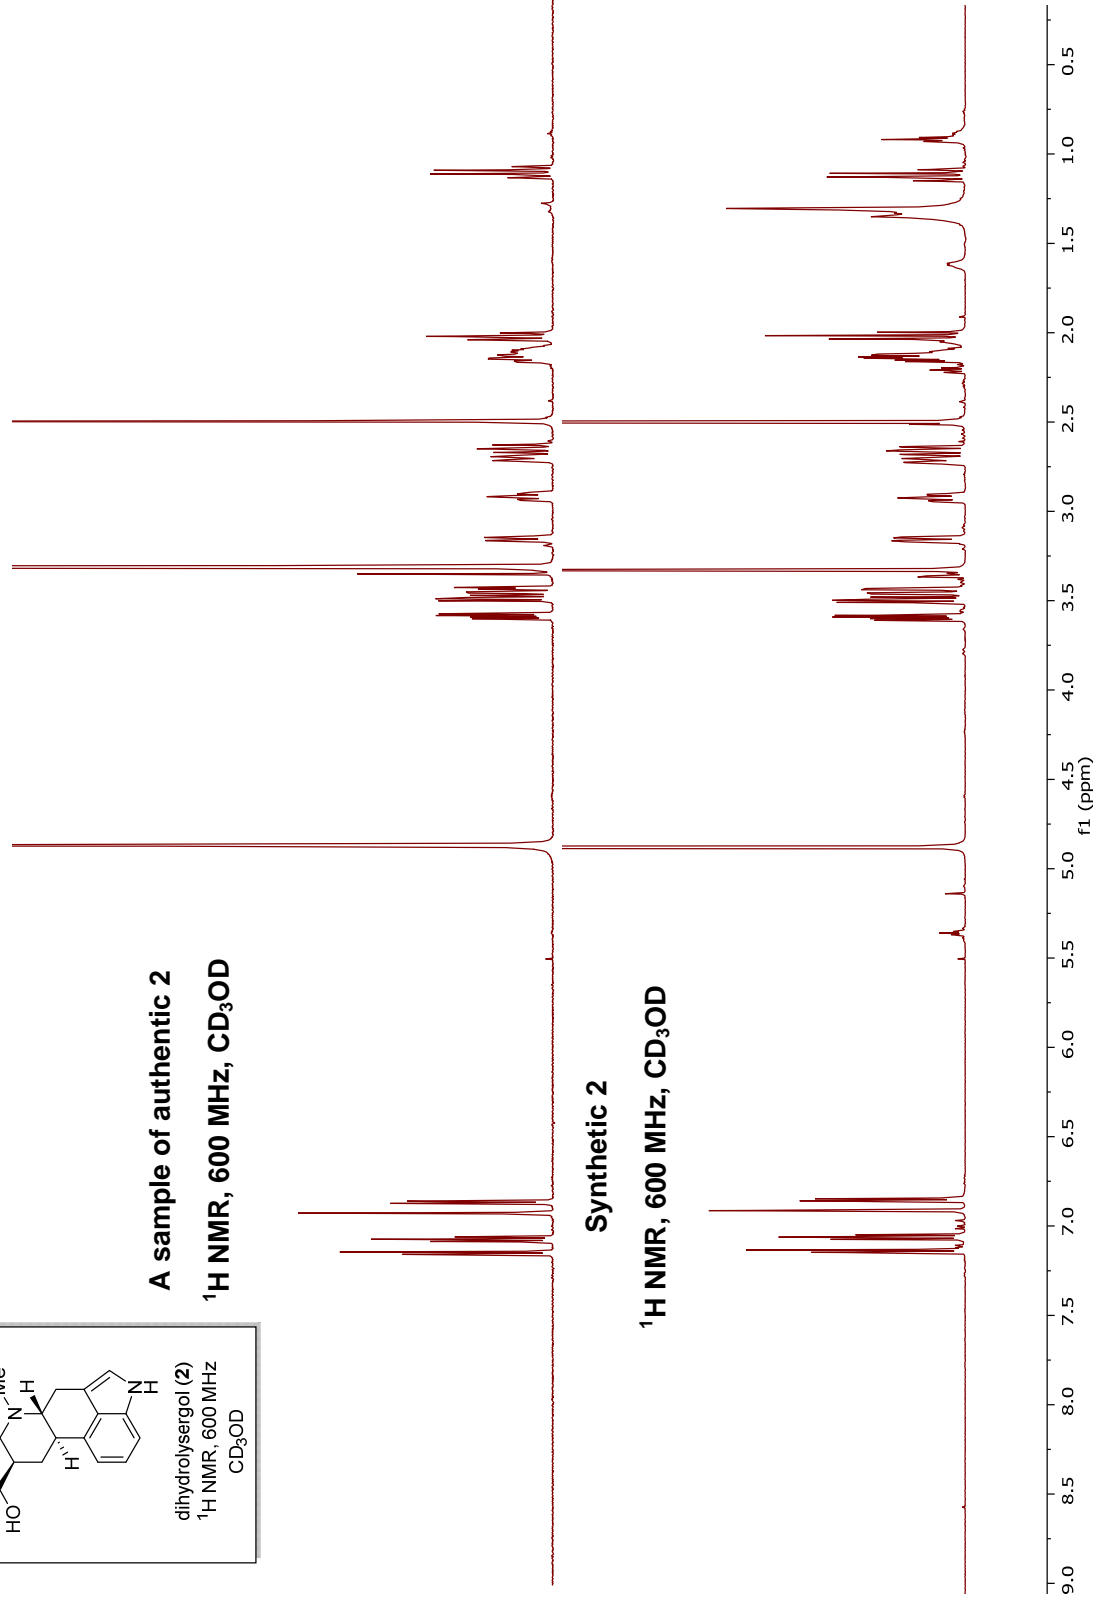

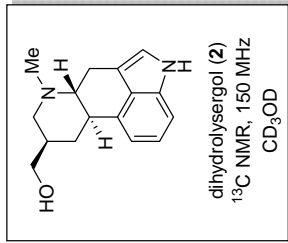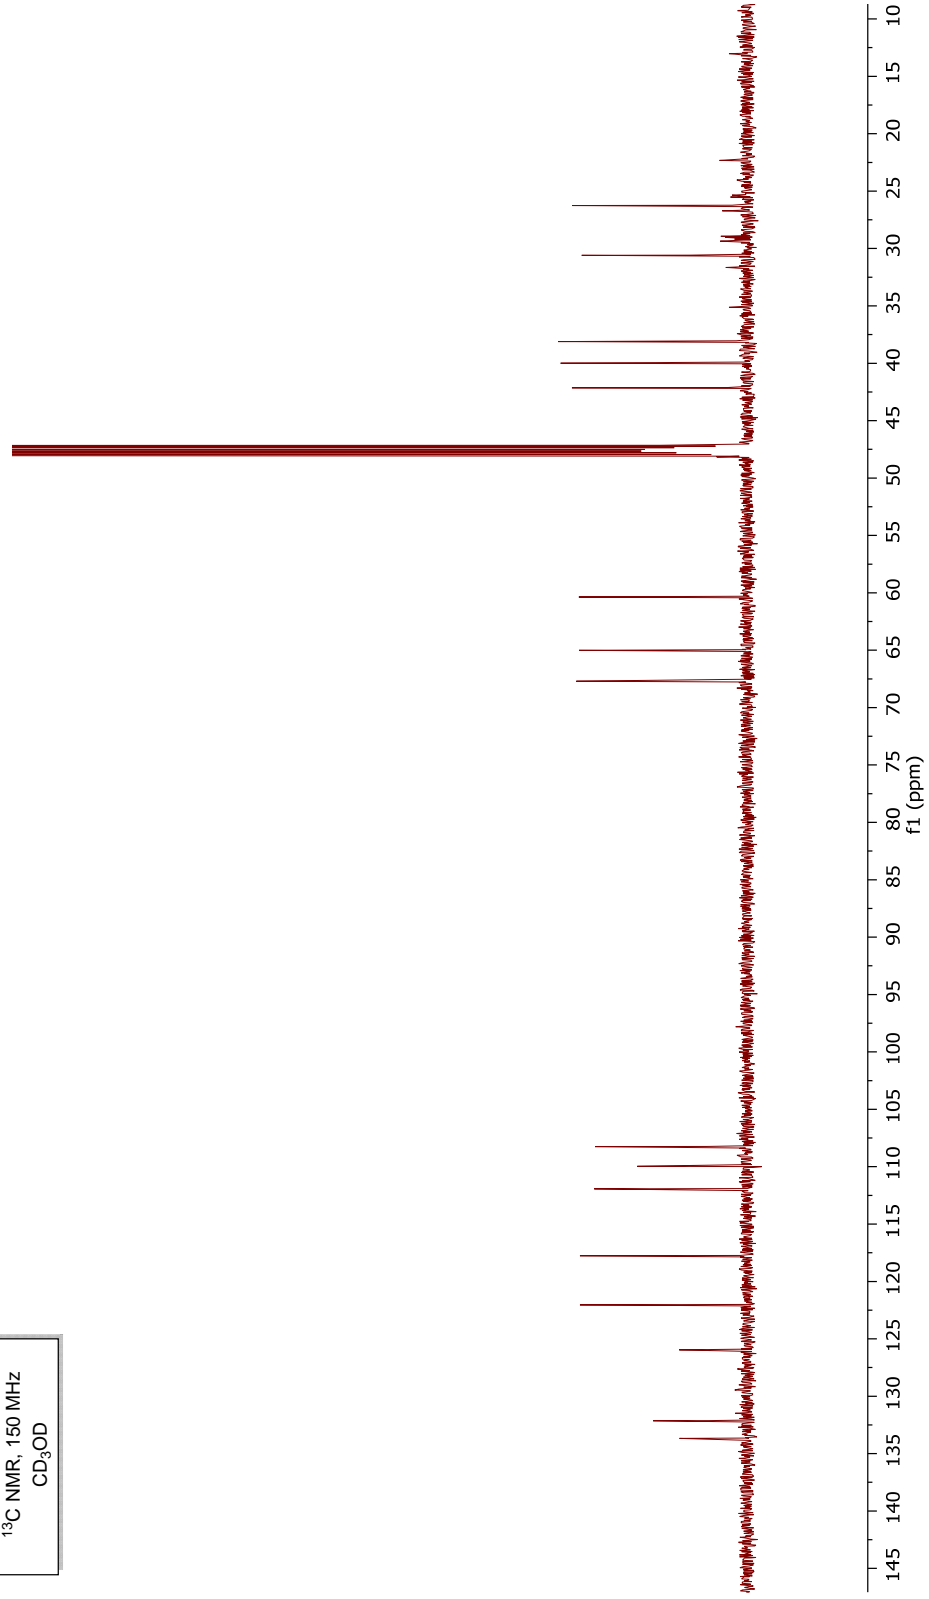

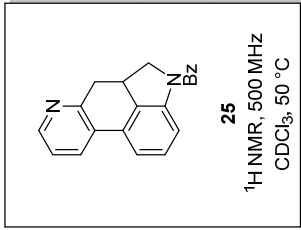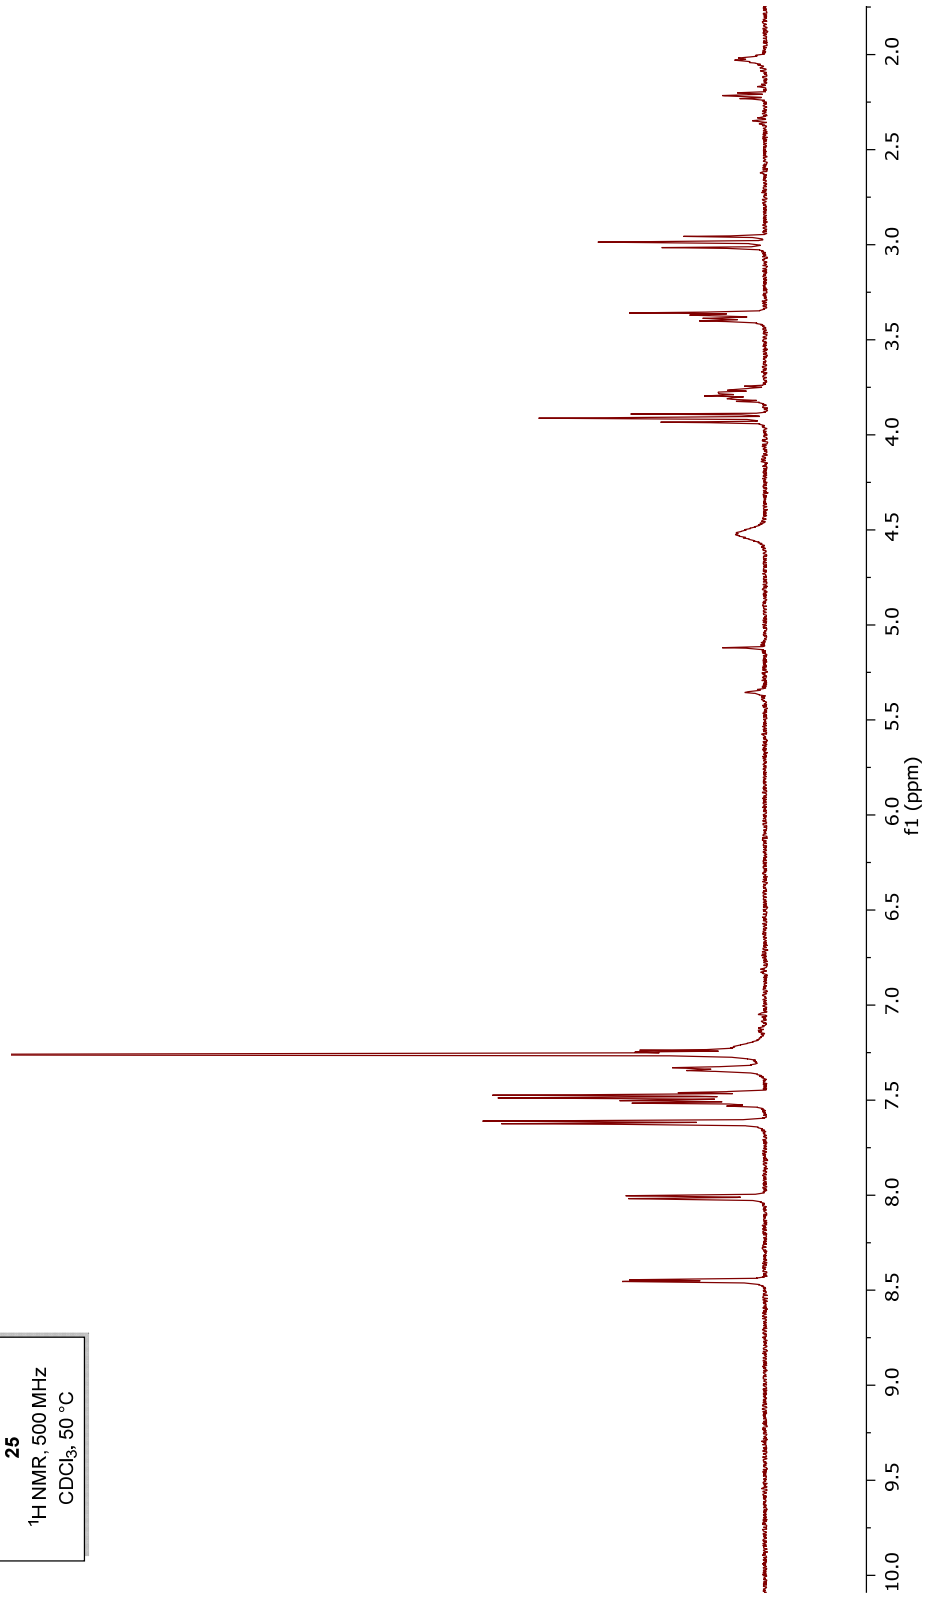



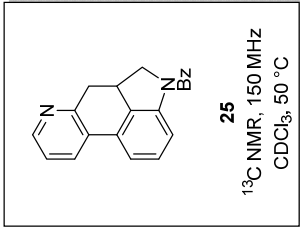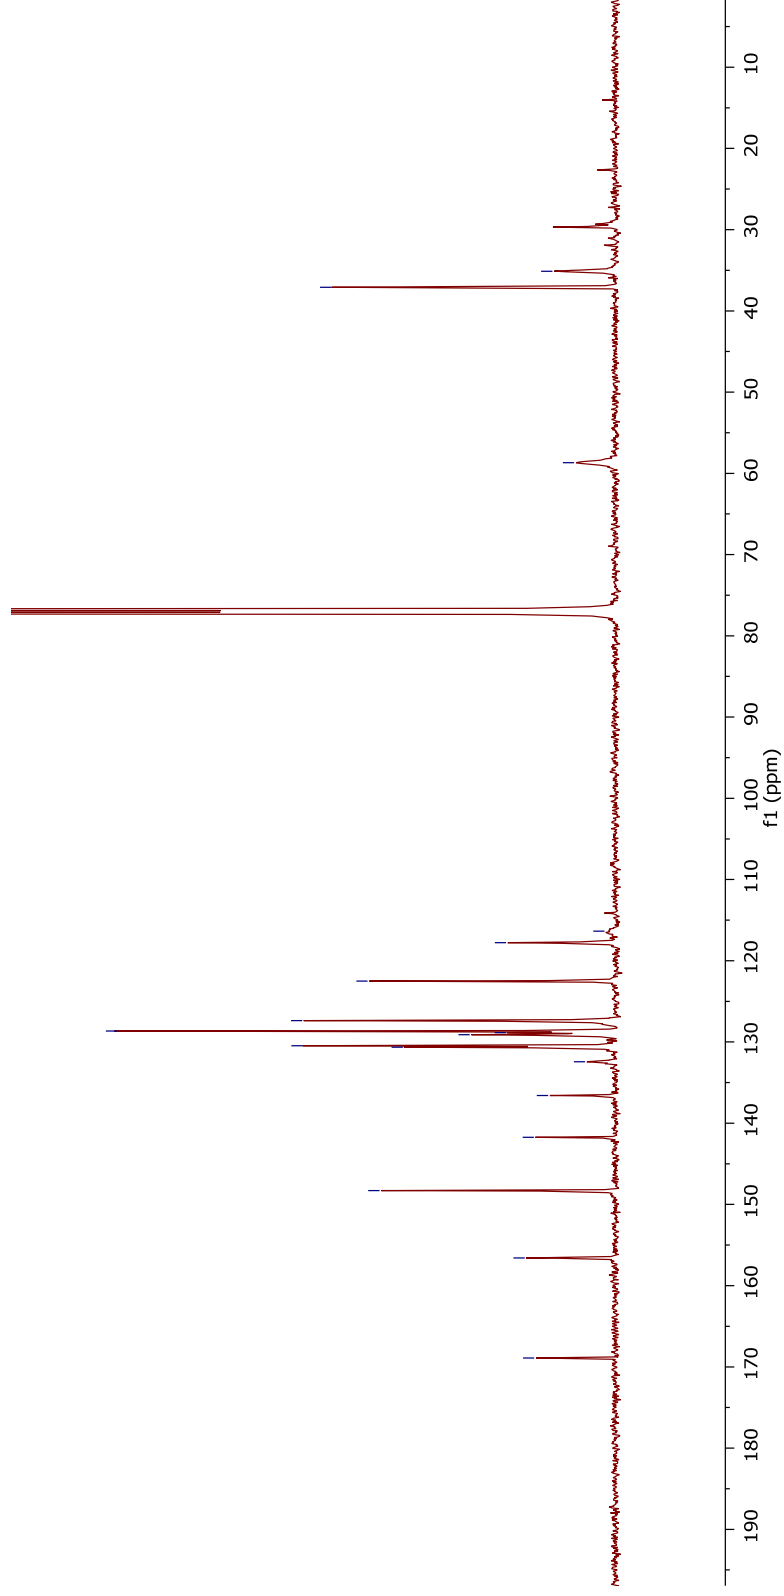

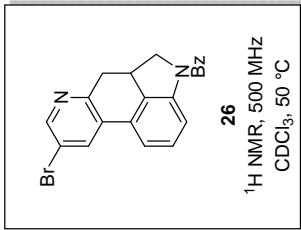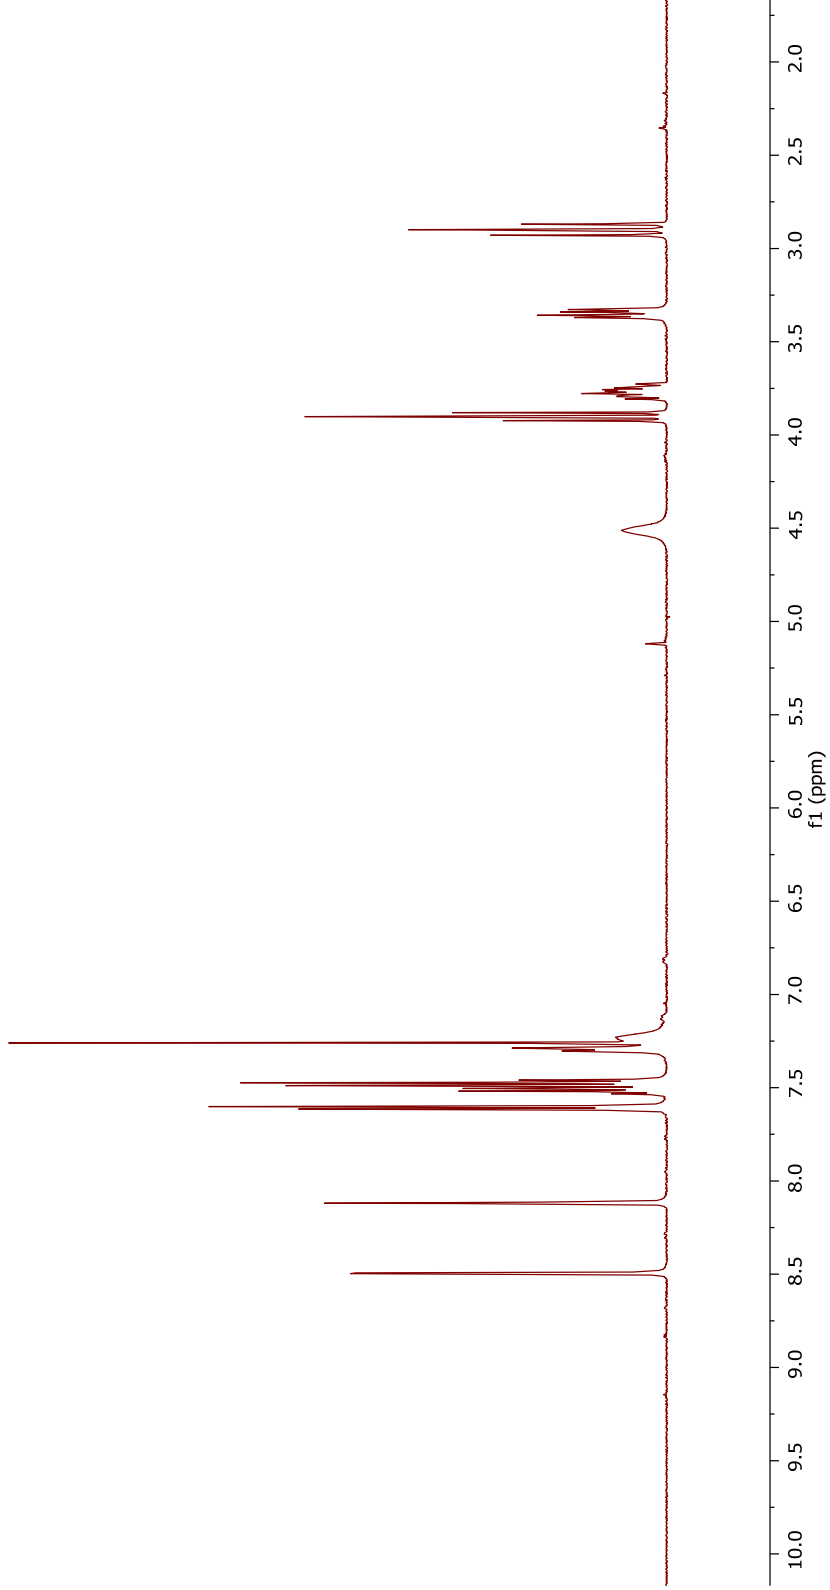

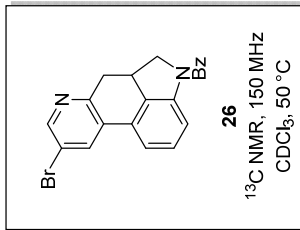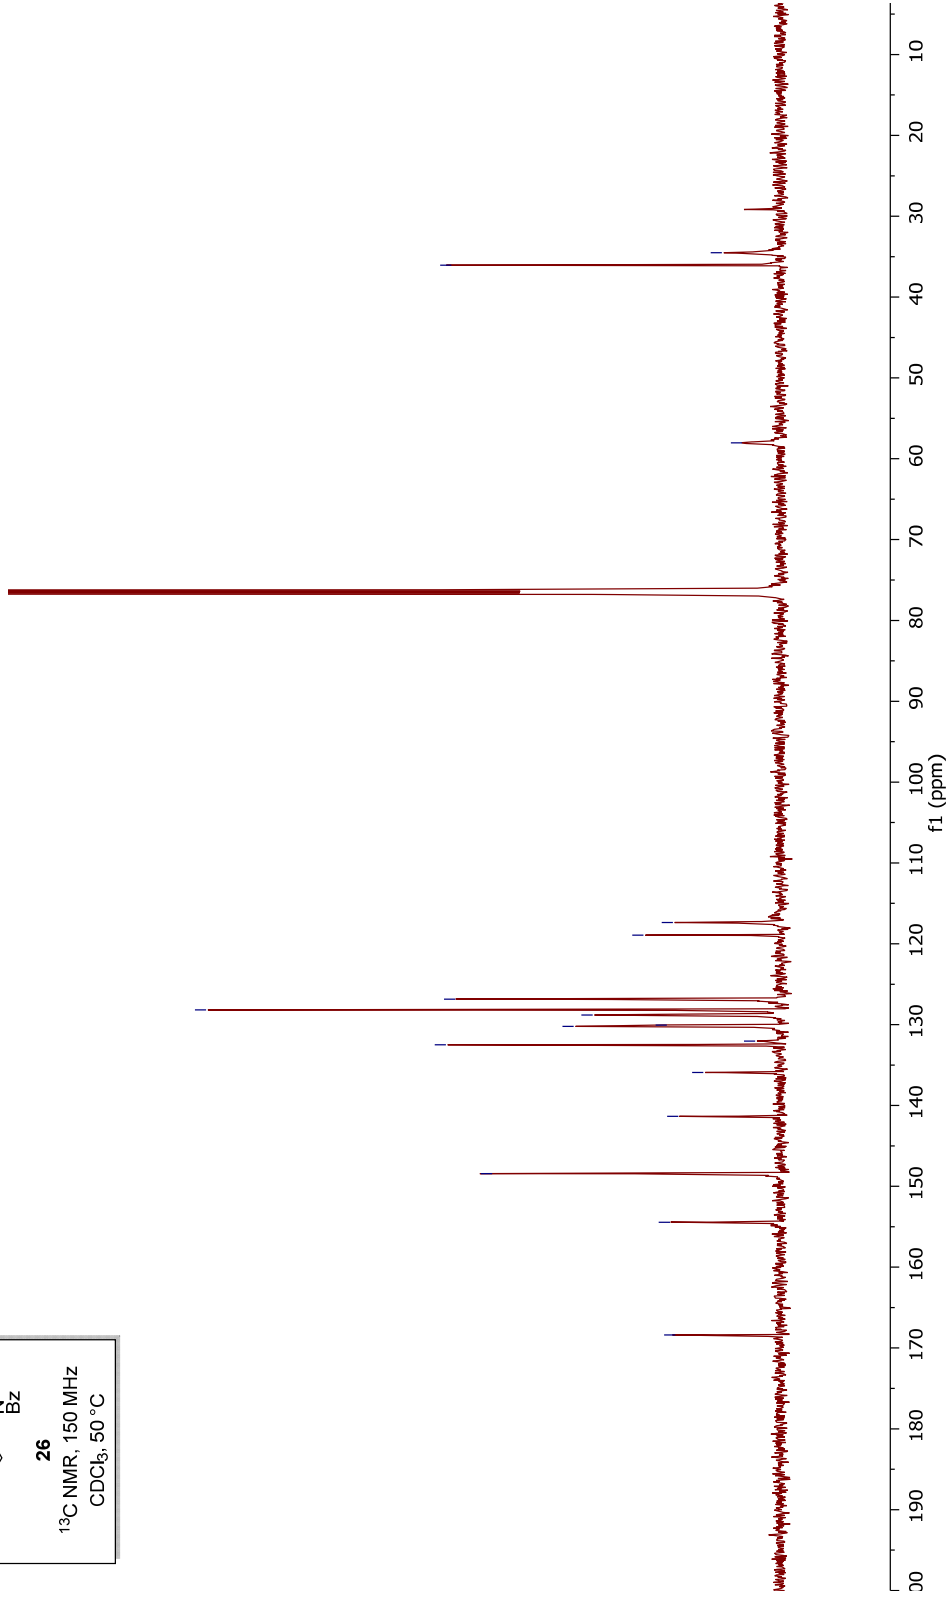



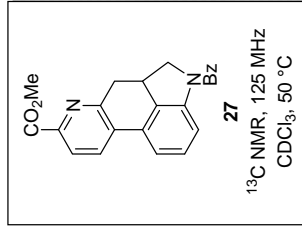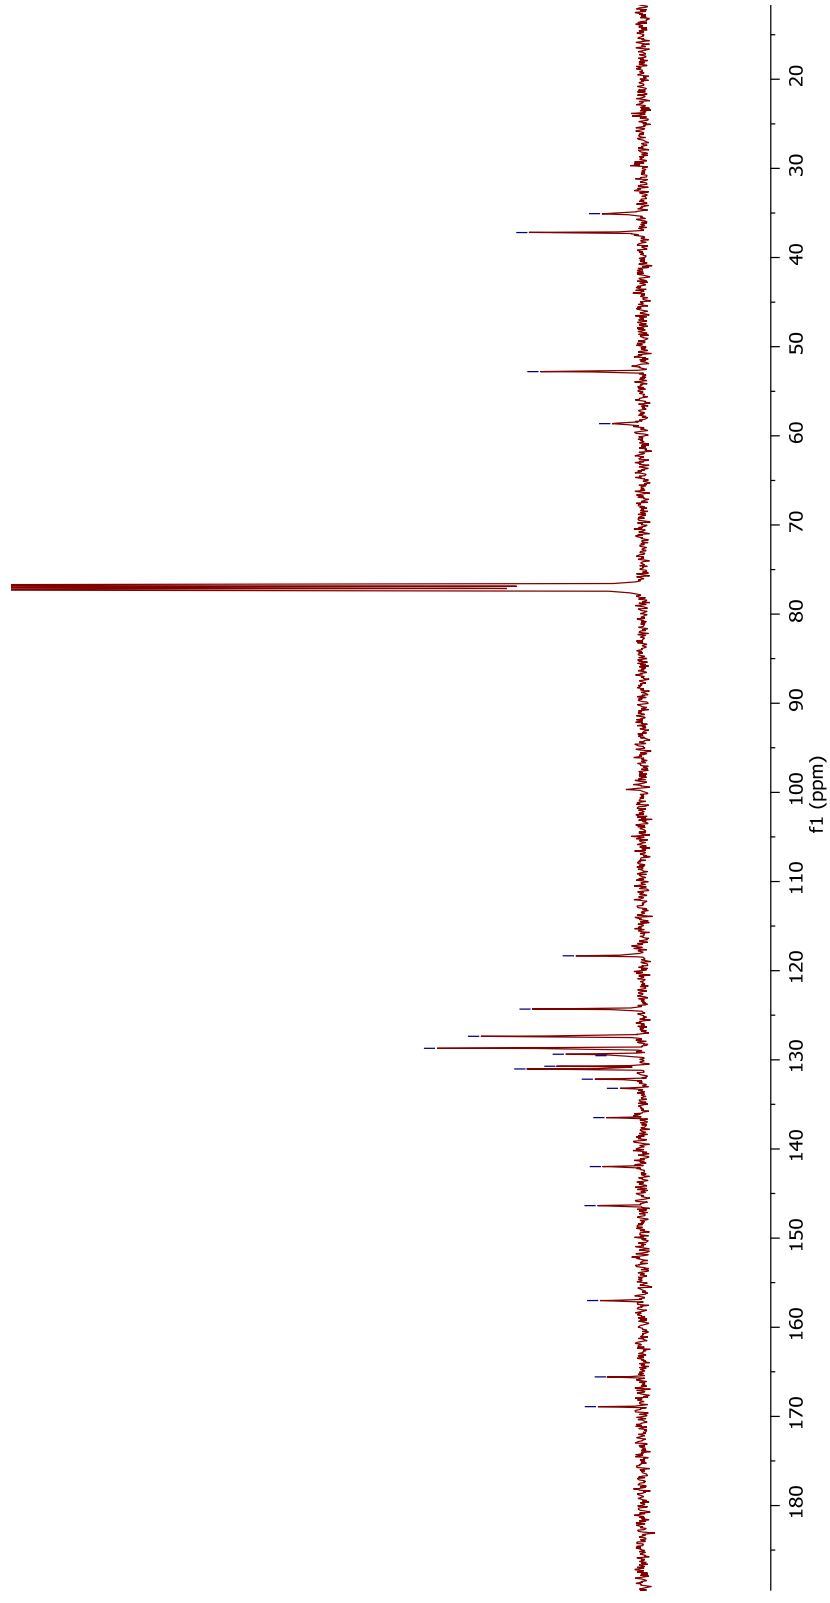

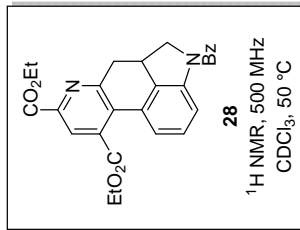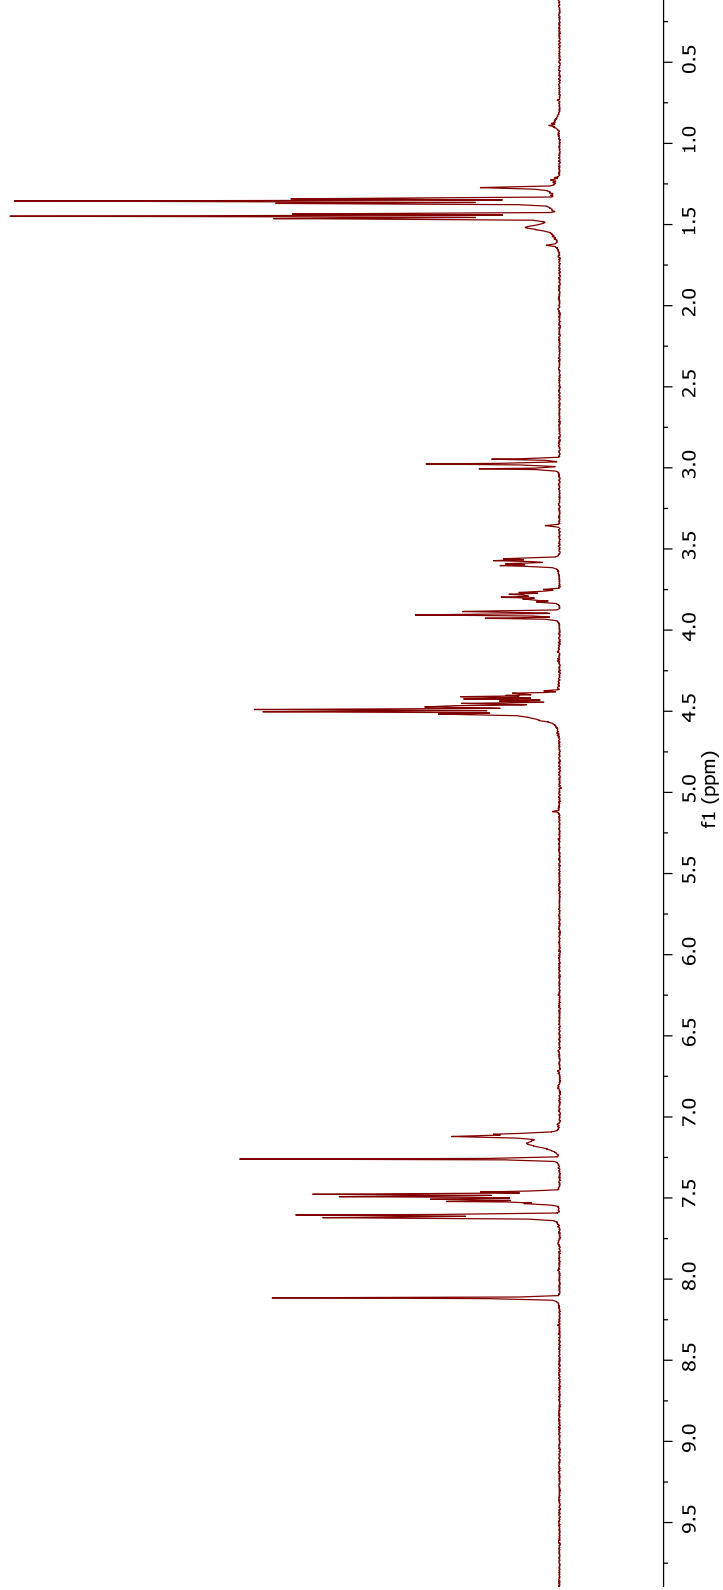

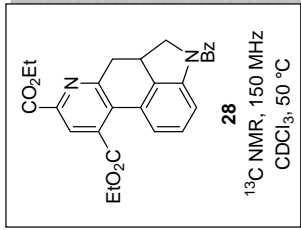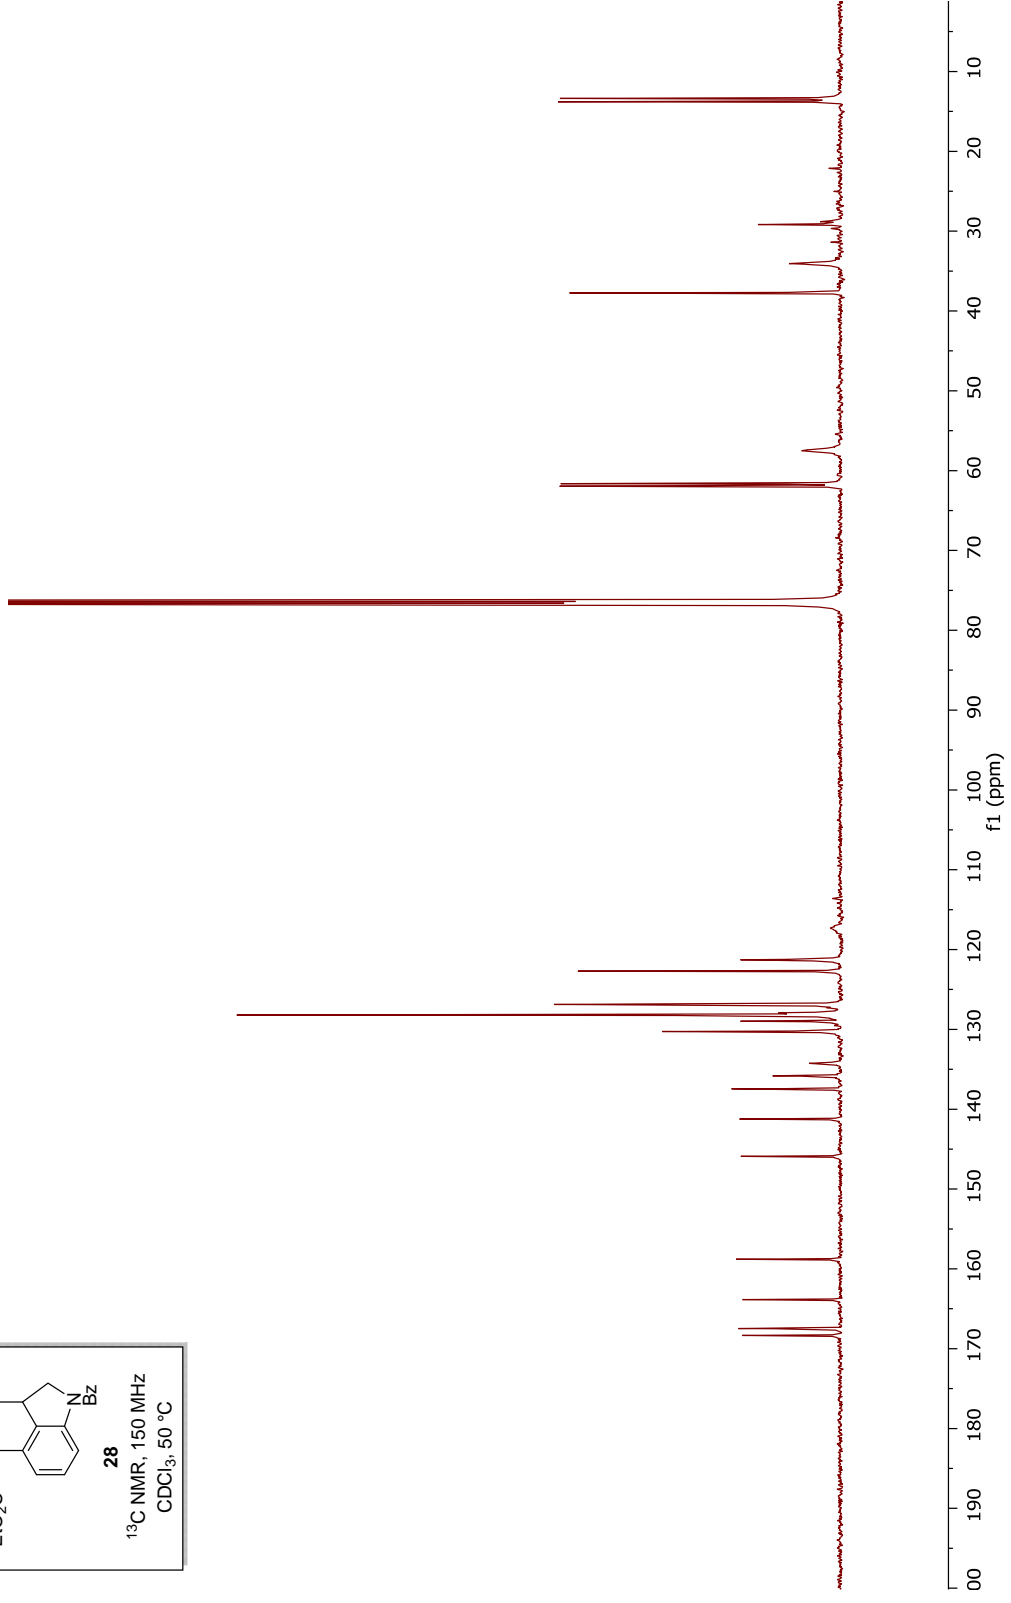

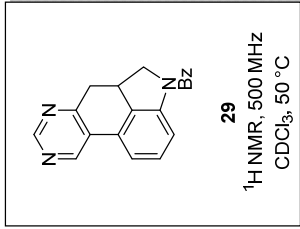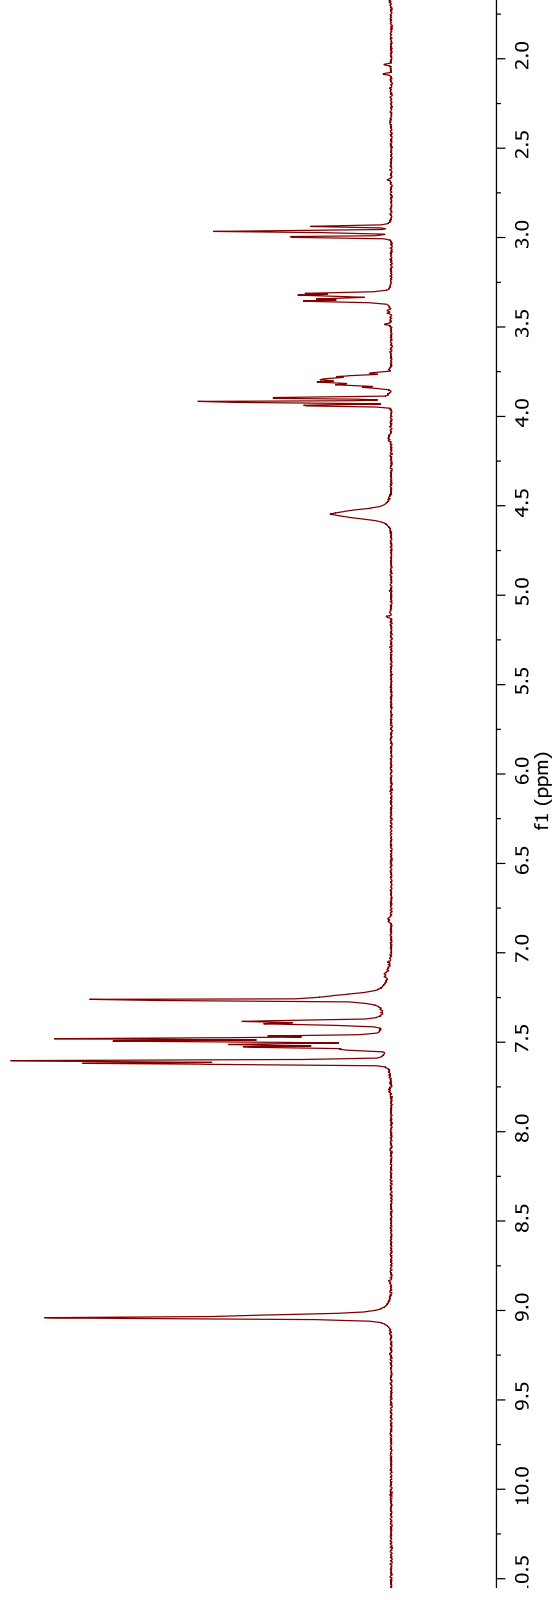





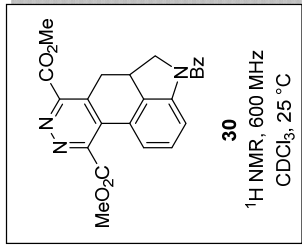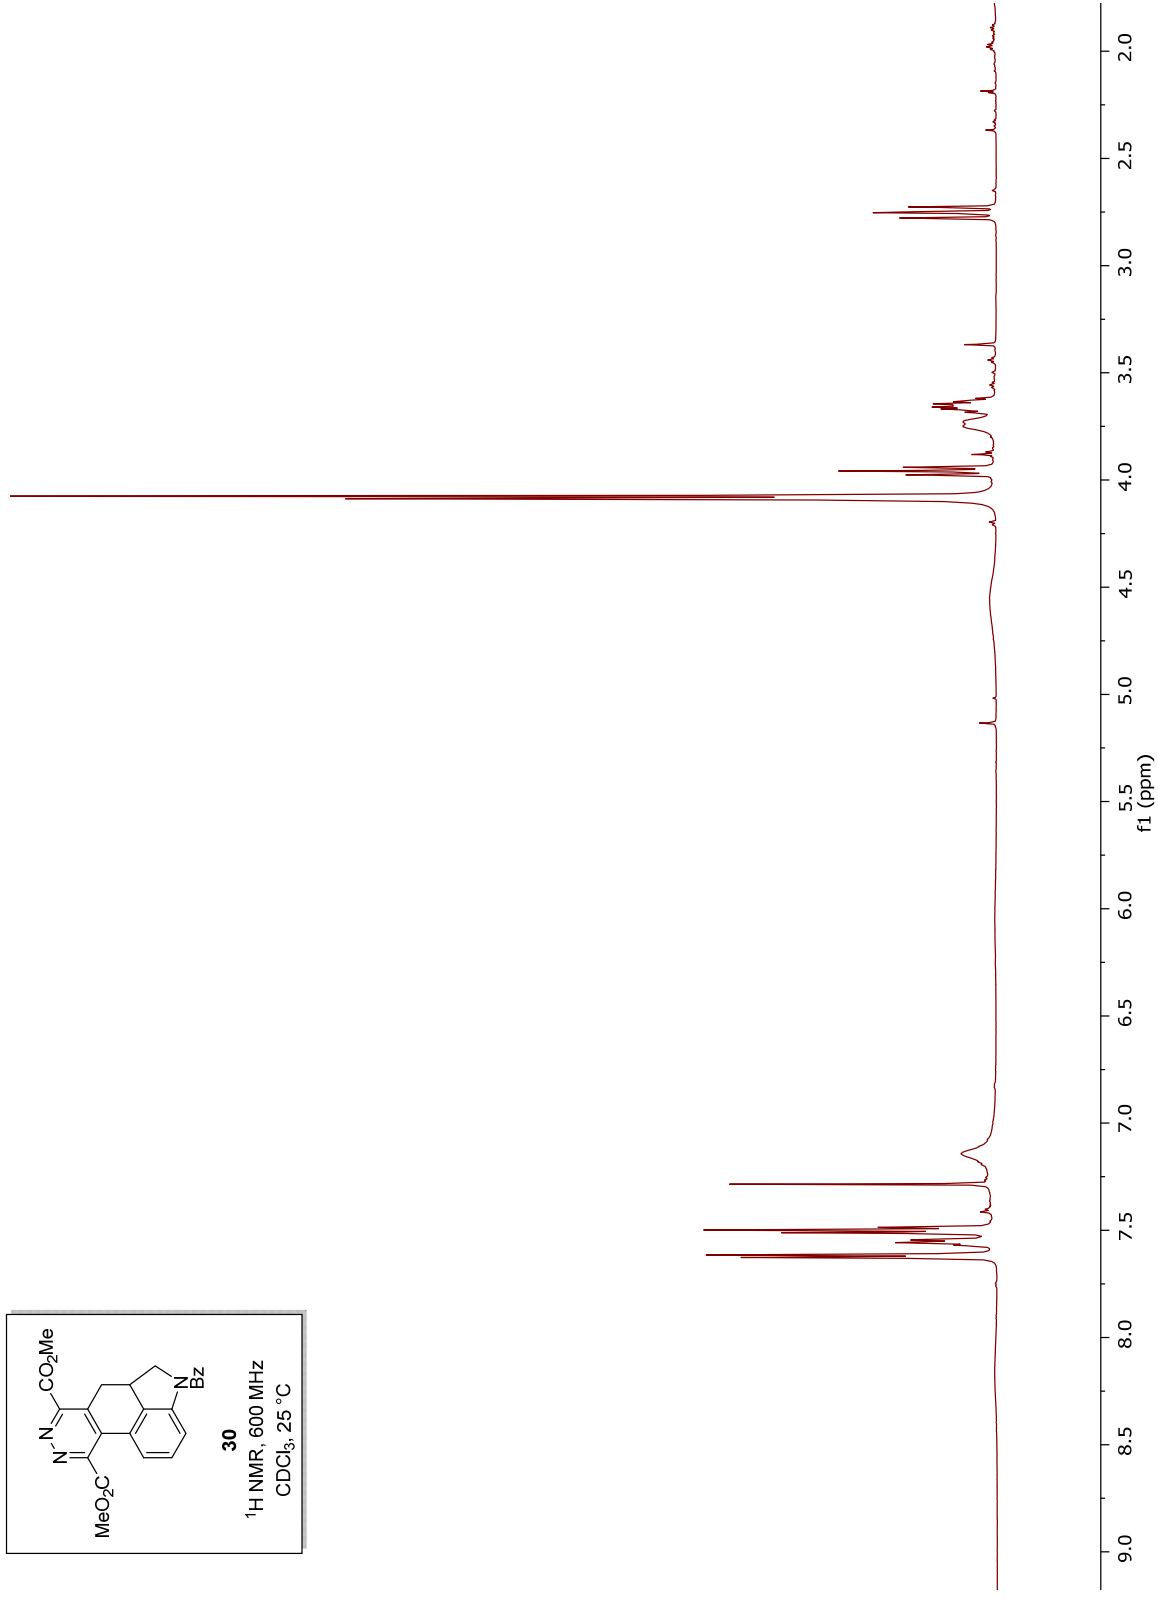

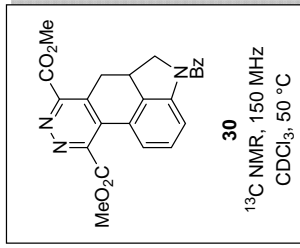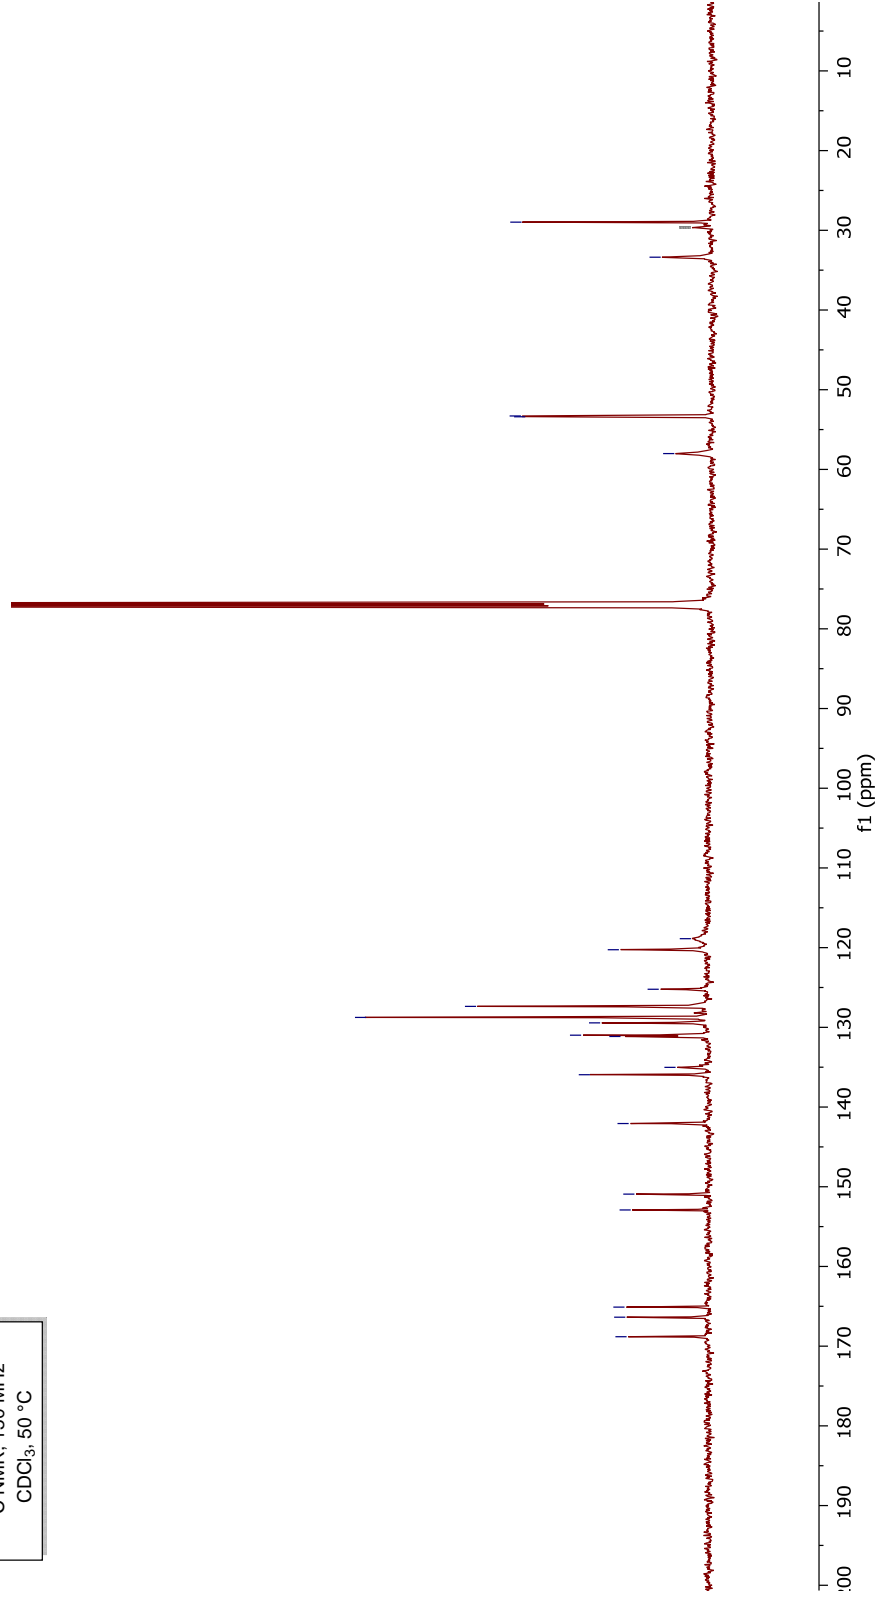

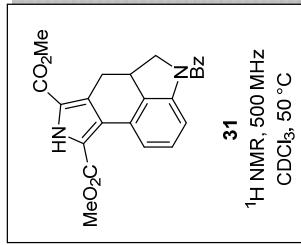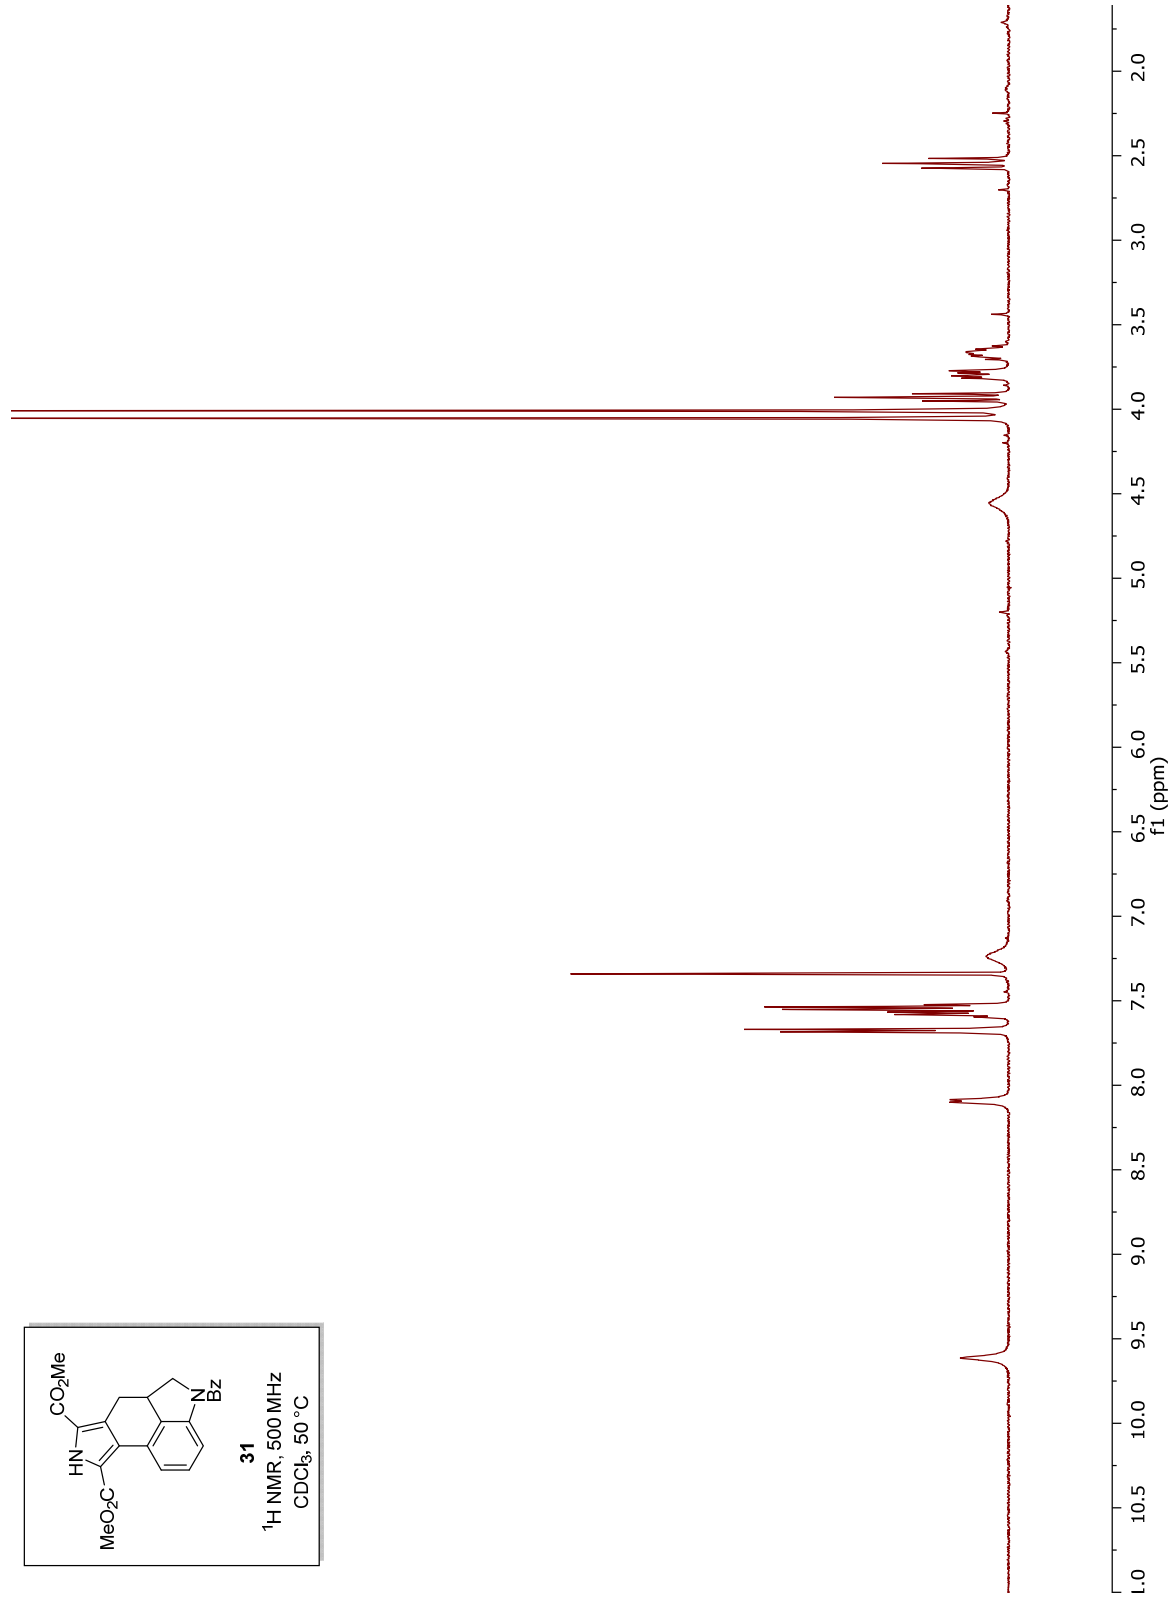

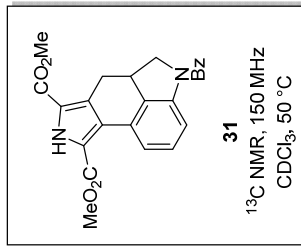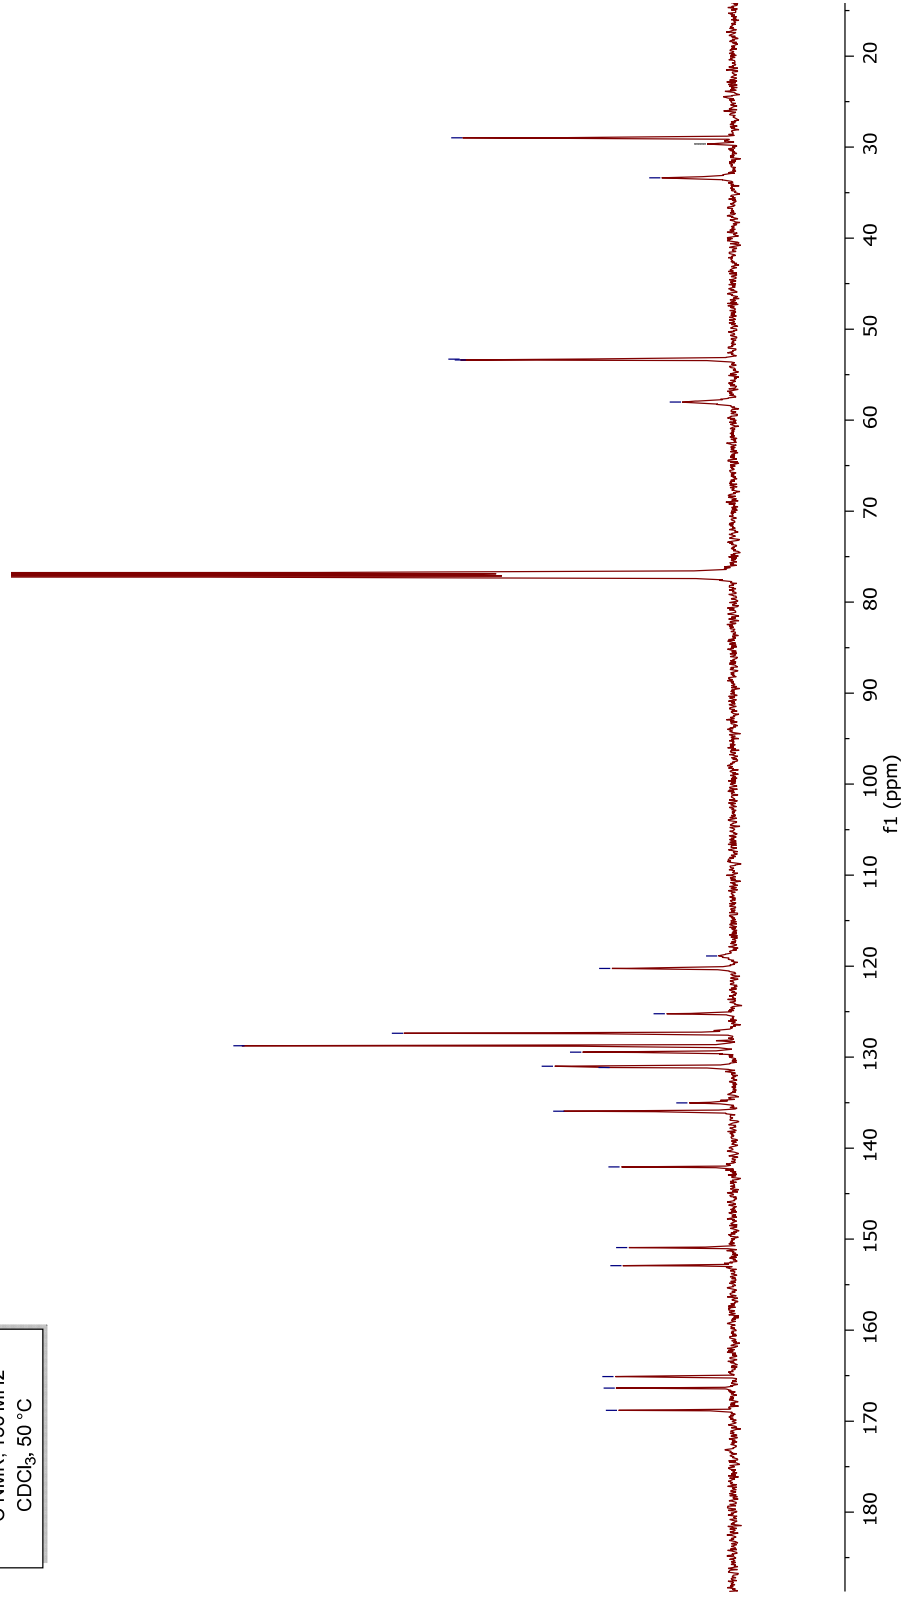

Supplement: NIHMS695719-supplement.pdf [file NIHMS695719-supplement.pdf]
